# Supplementary material for: Empirical analysis of project–purchaser dynamics in Japan’s blue carbon dioxide removal credit scheme
Source: Research Square preprint supplement (doi:10.21203/rs.3.rs-7525613/v1), 2025-10-27
Supplement: Supplementary file 1 [file 1ff08765833d488609af2b60.xlsx]

## Sheet: Supplementary Table 1
site	population	vegetation	method	years	creators	fisher	company	local_cor	municipality	local_org	academia	collaboration	education	sustainability	economy	innovation	conservation	public_offering
1	3769150	M	C	8	3	Y	N	Y	N	Y	N	Y	N	Y	Y	N	N	Y
2	1486033	M	C	9	5	Y	N	Y	N	Y	Y	Y	Y	N	N	N	Y	Y
3	131936	M	C	7	4	Y	N	Y	Y	Y	N	Y	Y	Y	Y	N	Y	Y
4	1486033	SW	C	25	1	N	N	N	Y	N	N	N	N	N	Y	N	Y	Y
5	41970	SW	R	28	2	Y	N	Y	Y	N	N	N	Y	N	Y	N	Y	Y
6	29479	SG	C	6	2	N	N	N	Y	Y	N	Y	Y	Y	Y	N	Y	Y
7	1170275	M	M	37	2	Y	N	N	Y	N	N	N	N	Y	Y	N	Y	Y
8	113179	SW	R	14	2	Y	N	N	N	Y	N	N	Y	Y	Y	N	Y	Y
9	31693	SW	R	17	5	Y	Y	Y	N	N	Y	Y	Y	Y	Y	Y	Y	Y
10	49858	SG	R	18	5	Y	N	N	Y	Y	N	Y	Y	Y	Y	N	Y	Y
11	123483	M	M	11	4	Y	Y	N	Y	N	Y	N	Y	N	Y	N	Y	Y
12	10376	SW	R	9	3	Y	N	N	Y	Y	N	Y	N	Y	N	N	Y	Y
13	307094	SG	R	23	3	Y	Y	N	N	Y	N	N	Y	Y	Y	N	Y	N
14	126361	M	C	11	2	Y	N	N	Y	N	N	N	Y	Y	Y	N	Y	Y
15	31667	SW	R	8	5	Y	Y	Y	Y	Y	N	Y	Y	Y	Y	N	Y	Y
16	23399	SW	R	5	5	Y	N	Y	Y	N	N	N	Y	Y	N	Y	Y	Y
17	19601	A	C	49	5	Y	Y	Y	Y	N	Y	N	Y	Y	Y	Y	Y	Y
18	1695	SW	M	15	5	Y	Y	Y	Y	Y	N	N	Y	Y	Y	Y	Y	Y
19	367698	SW	R	11	3	Y	Y	N	Y	N	N	Y	Y	N	Y	N	N	Y
20	4075	SW	R	71	3	Y	N	Y	Y	Y	N	Y	Y	Y	Y	Y	Y	Y
21	229012	M	R	11	2	Y	N	N	Y	N	N	Y	Y	Y	Y	N	Y	Y
22	3337	A	C	54	2	Y	N	N	Y	N	N	N	Y	Y	Y	N	Y	Y
23	1486033	M	M	14	4	Y	Y	N	Y	N	N	Y	Y	Y	Y	N	Y	Y
24	30117	SW	M	10	5	Y	N	Y	Y	N	N	N	Y	Y	Y	Y	Y	Y
25	178010	SW	M	40	5	Y	N	Y	Y	N	N	Y	N	Y	N	N	Y	Y
26	11417	A	C	13	5	Y	Y	Y	Y	N	N	N	Y	N	Y	N	Y	Y
27	516989	SW	C	9	3	Y	Y	N	N	N	N	N	N	N	Y	Y	N	Y
28	2090	A	C	2	2	Y	Y	Y	Y	Y	N	Y	N	Y	Y	N	N	Y
29	113179	A	C	5	5	Y	Y	N	Y	Y	Y	Y	Y	Y	Y	N	Y	Y
30	2800023	T	C	41	1	N	N	N	Y	N	N	Y	Y	Y	N	N	Y	Y
31	71018	SG	R	8	1	Y	N	Y	Y	N	Y	Y	Y	Y	Y	Y	Y	Y
32	15619	SW	R	9	4	Y	Y	N	Y	N	N	N	N	Y	Y	N	Y	Y
33	96572	SW	R	8	2	Y	Y	Y	Y	N	Y	Y	Y	Y	Y	N	Y	Y
34	18938	SW	R	4	5	Y	N	Y	Y	N	N	Y	N	Y	Y	N	Y	Y
35	1091266	A	C	2	5	Y	Y	Y	Y	Y	N	N	N	Y	Y	N	N	Y
36	241776	SW	R	3	4	Y	Y	N	N	N	N	N	N	N	Y	Y	Y	N
37	63896	SW	R	3	4	N	Y	Y	N	Y	N	Y	N	N	Y	Y	Y	N
38	99365	SW	C	35	1	N	Y	N	N	N	N	N	N	Y	N	Y	Y	N
39	14580	SW	C	48	4	Y	N	N	Y	N	N	Y	N	Y	Y	Y	N	Y
40	195720	SW	C	20	1	N	Y	N	N	N	N	N	N	N	N	N	N	N
41	3589	SW	R	10	2	Y	Y	N	N	N	N	N	N	Y	Y	N	Y	N
42	908181	SW	C	6	1	N	Y	N	N	N	N	N	N	N	Y	Y	N	N
43	112279	SW	C	1	4	Y	Y	N	N	N	N	N	N	N	N	Y	Y	Y
44	8396	SW	C	2	2	Y	Y	N	N	N	N	N	N	Y	Y	N	Y	N
45	14898	SW	C	16	5	Y	N	Y	Y	N	N	Y	Y	Y	Y	N	Y	Y
46	2787	A	C	6	2	Y	N	N	Y	N	N	Y	Y	Y	Y	N	Y	Y
47	16250	A	C	6	1	Y	N	N	N	N	N	Y	Y	Y	Y	Y	Y	Y
48	79142	SW	C	13	3	Y	Y	N	Y	N	N	N	N	N	Y	Y	Y	N
49	50341	A	C	6	5	Y	N	Y	Y	N	N	Y	Y	Y	Y	N	Y	Y
50	261227	SG	C	3	3	N	Y	N	N	Y	Y	Y	Y	N	Y	N	Y	Y
51	78941	SG	R	22	5	Y	Y	N	Y	Y	Y	Y	Y	Y	N	Y	Y	Y
52	126933	A	C	3	3	Y	Y	N	Y	N	N	N	Y	Y	Y	Y	N	Y
53	80822	M	M	34	3	Y	Y	N	Y	N	N	Y	Y	Y	Y	N	N	Y
54	152875	SW	R	33	3	Y	Y	N	N	N	N	N	N	Y	Y	Y	Y	N
55	41831	SG	R	15	2	Y	Y	Y	Y	Y	N	Y	Y	Y	N	Y	Y	N
56	14742	SG	R	21	5	Y	Y	N	Y	Y	Y	Y	Y	Y	Y	Y	Y	N
57	234530	A	C	8	2	Y	N	N	Y	N	N	N	Y	Y	Y	N	Y	Y
58	2406	SG	R	18	3	Y	N	N	Y	N	Y	Y	N	N	Y	N	Y	Y
59	1399	SW	R	6	2	Y	Y	N	N	N	N	N	N	Y	Y	Y	N	N
60	7462	SW	R	2	2	Y	Y	N	N	N	N	N	N	Y	Y	Y	Y	N
61	3498	M	R	1	2	Y	Y	N	N	N	N	N	N	Y	Y	Y	N	N

## Sheet: Supplementary Table 2
Var1	Var2	Association Strength	q-value	p-value	Sample Size
trading	municipality	0.530723	0.00602844	3.94016e-05	60
vegetation	method	0.486473	0.00604579	7.903e-05	60
trading	company	0.466041	0.0156196	0.000306267	60
creators	local_col	0.432056	0.0216684	0.000566494	60
trading	education	0.409878	0.0458655	0.00149887	60
vegetation	education	0.452908	0.0890267	0.00640061	60
population	vegetation	0.451288	0.0890267	0.00494075	60
municipality	education	0.370521	0.0890267	0.00410417	60
local_org	collaboration	0.358287	0.0890267	0.00551541	60
creators	fisher	0.358156	0.0890267	0.00495771	60
trading	innovation	0.353553	0.0890267	0.0061699	60
vegetation	academia	0.42962	0.13335	0.0113304	60
fisher	sustainability	0.32972	0.13335	0.0106494	60
vegetation	local_org	0.425077	0.137865	0.0126151	60
trading	creators	0.313888	0.148862	0.0145943	60
trading	collaboration	0.30792	0.163257	0.0170727	60
company	municipality	0.297282	0.186548	0.0212936	60
education	conservation	0.295804	0.186548	0.0219468	60
creators	municipality	0.29046	0.196191	0.0243636	60
population	conservation	0.273472	0.253311	0.0344955	60
collaboration	education	0.270449	0.253311	0.0361806	60
academia	education	0.269385	0.253311	0.0369201	60
company	innovation	0.267752	0.253311	0.0380794	60
vegetation	collaboration	0.366713	0.277238	0.0446133	60
academia	collaboration	0.258438	0.277238	0.0453004	60
creators	local_org	0.25669	0.280852	0.0477265	60
municipality	innovation	0.252591	0.285596	0.0503993	60
vegetation	trading	0.350661	0.289855	0.0607834	60
method	trading	0.301416	0.289855	0.0655104	60
method	fisher	0.29963	0.289855	0.0676543	60
municipality	collaboration	0.247487	0.289855	0.0552343	60
local_col	collaboration	0.2421	0.289855	0.0607516	60
trading	local_col	0.239617	0.289855	0.0634443	60
fisher	municipality	0.238623	0.289855	0.06455	60
creators	academia	0.237818	0.289855	0.0672906	60
company	collaboration	0.235435	0.289855	0.0682012	60
vegetation	innovation	0.336371	0.301967	0.0789457	60
creators	education	0.230764	0.301967	0.0760774	60
creators	collaboration	0.22955	0.301967	0.0776776	60
company	conservation	0.227027	0.301967	0.078655	60
years	municipality	0.227008	0.302692	0.0811135	60
population	method	0.280218	0.349713	0.0972336	60
population	innovation	0.215448	0.349713	0.0982853	60
trading	fisher	0.209822	0.362	0.104105	60
local_col	municipality	0.207874	0.365014	0.107357	60
vegetation	municipality	0.312492	0.378263	0.118671	60
municipality	sustainability	0.204124	0.378263	0.113846	60
years	company	0.203879	0.378263	0.118175	60
population	education	0.199384	0.387877	0.126682	60
creators	conservation	0.199346	0.387877	0.126757	60
method	municipality	0.25737	0.411245	0.137082	60
local_col	local_org	0.188353	0.425279	0.144572	60
local_col	education	0.187074	0.425279	0.147319	60
academia	conservation	0.18306	0.442557	0.156197	60
population	municipality	0.177435	0.469761	0.175009	60
education	sustainability	0.175662	0.469761	0.173617	60
local_org	education	0.175629	0.469761	0.173699	60
collaboration	innovation	0.170103	0.494961	0.187632	60
fisher	education	0.166737	0.50961	0.196516	60
vegetation	fisher	0.273081	0.545695	0.214586	60
company	education	0.159183	0.545695	0.217565	60
method	creators	0.220824	0.559148	0.240561	60
method	conservation	0.218752	0.559148	0.23798	60
company	sustainability	0.155347	0.559148	0.228855	60
collaboration	sustainability	0.15396	0.559148	0.233038	60
population	local_org	0.153635	0.559148	0.241201	60
years	sustainability	0.146155	0.605497	0.265152	60
company	local_col	0.137263	0.647272	0.287676	60
population	company	0.135067	0.665397	0.303507	60
municipality	conservation	0.132583	0.665397	0.30443	60
years	method	0.197111	0.696537	0.32323	60
trading	academia	0.124341	0.712886	0.335476	60
vegetation	conservation	0.23233	0.726801	0.356275	60
population	sustainability	0.123582	0.726801	0.34684	60
population	trading	0.122021	0.726801	0.353012	60
vegetation	economy	0.227071	0.740296	0.377406	60
method	innovation	0.180937	0.740296	0.374508	60
fisher	local_col	0.114918	0.740296	0.373383	60
method	sustainability	0.177488	0.752718	0.388658	60
company	academia	0.110101	0.753041	0.393747	60
vegetation	sustainability	0.214722	0.786405	0.429073	60
education	innovation	0.10351	0.786405	0.422678	60
local_org	sustainability	0.103429	0.786405	0.423042	60
population	fisher	0.1034	0.786405	0.431752	60
method	local_org	0.16247	0.815374	0.452985	60
local_org	academia	0.0941384	0.82884	0.465884	60
years	conservation	0.0932047	0.83399	0.478748	60
years	trading	0.093008	0.83399	0.479681	60
years	innovation	0.0873756	0.861545	0.506791	60
economy	innovation	0.0857493	0.861545	0.506555	60
local_org	innovation	0.0804486	0.886611	0.533185	60
local_col	sustainability	0.0798723	0.886611	0.536122	60
years	education	0.0793559	0.886611	0.546702	60
population	local_col	0.078606	0.886611	0.55051	60
local_col	conservation	0.0778179	0.886611	0.546659	60
academia	sustainability	0.0746047	0.897825	0.563341	60
method	collaboration	0.134881	0.909111	0.579385	60
education	economy	0.0710072	0.909111	0.582306	60
creators	economy	0.069362	0.911192	0.598465	60
years	local_org	0.068767	0.911192	0.601614	60
trading	sustainability	0.0666667	0.911192	0.605577	60
fisher	economy	0.065429	0.911192	0.612287	60
local_org	economy	0.0652213	0.911192	0.613417	60
vegetation	company	0.16827	0.913164	0.637181	60
creators	company	0.0642028	0.913164	0.626007	60
creators	sustainability	0.0627776	0.913164	0.633708	60
years	economy	0.0618727	0.913164	0.638618	60
innovation	conservation	0.0595362	0.913296	0.64468	60
fisher	company	0.0558775	0.933639	0.665142	60
vegetation	local_col	0.158606	0.945976	0.680114	60
method	academia	0.107285	0.952074	0.708007	60
municipality	economy	0.0495074	0.952074	0.701362	60
sustainability	conservation	0.0481125	0.952074	0.709388	60
trading	conservation	0.0481125	0.952074	0.709388	60
method	education	0.0986566	0.963468	0.746773	60
population	academia	0.0463488	0.963468	0.725098	60
population	collaboration	0.042112	0.963468	0.749364	60
local_col	academia	0.041712	0.963468	0.74662	60
collaboration	conservation	0.0416667	0.963468	0.746886	60
method	company	0.0919106	0.973352	0.776137	60
population	years	0.038902	0.973352	0.767913	60
years	creators	0.0380295	0.973352	0.772977	60
economy	conservation	0.035007	0.978038	0.786266	60
fisher	local_org	0.0316223	0.990485	0.806499	60
years	fisher	0.030109	0.990485	0.819359	60
population	creators	0.0295243	0.990485	0.82281	60
sustainability	economy	0.0269484	0.990485	0.83465	60
trading	economy	0.0269484	0.990485	0.83465	60
local_org	conservation	0.0268715	0.990485	0.835115	60
method	local_col	0.0684071	1	0.869023	60
years	vegetation	0.0602175	1	0.97674	60
vegetation	creators	0.0578647	1	0.979269	60
years	local_col	0.022923	1	0.861984	60
trading	local_org	0.0206857	1	0.872699	60
creators	innovation	0.0197291	1	0.881064	60
local_col	economy	0.0193719	1	0.880722	60
municipality	academia	0.0152286	1	0.906099	60
population	economy	0.0138298	1	0.916474	60
fisher	conservation	0.0129794	1	0.919918	60
years	academia	0.0113004	1	0.93171	60
method	economy	0.0104434	1	0.996733	60
academia	innovation	0.00879225	1	0.945702	60
years	collaboration	0.0046027	1	0.972157	60
fisher	academia	2.57831e-16	1	1	60
municipality	local_org	1.00379e-16	1	1	60
fisher	innovation	8.84647e-17	1	1	60
company	local_org	7.22749e-17	1	1	60
company	economy	7.10086e-17	1	1	60
academia	economy	5.70505e-17	1	1	60
local_col	innovation	0	1	1	60
fisher	collaboration	0	1	1	60
collaboration	economy	0	1	1	60
sustainability	innovation	0	1	1	60

## Sheet: Supplementary Table 3
site	population	vegetation	method	creators	fisher	company	local_col	municipality	local_org	academia	years	collaboration	education	sustainability	economy	innovation	conservation	public_offering	offertype	unit	volume	amount	industry	business size	size_categorized	local_LPO	local_same_municipality	policy_decarbon	policy_biodiversity	policy_sustainability
1	3769150	M	C	3	Y	N	Y	N	Y	N	8	Y	N	Y	Y	N	N	Y	A	NA	14.4	NA	W	4802	L	L	L	N	N	Y
1	3769150	M	C	3	Y	N	Y	N	Y	N	8	Y	N	Y	Y	N	N	Y	A	NA	5.8	NA	E	3190	L	L	L	Y	N	N
1	3769150	M	C	3	Y	N	Y	N	Y	N	8	Y	N	Y	Y	N	N	Y	A	NA	2.6	NA	R	8333	L	L	L	N	N	N
1	3769150	M	C	3	Y	N	Y	N	Y	N	8	Y	N	Y	Y	N	N	Y	B	103092	8.6	886591	T	1243	L	L	L	Y	N	Y
1	3769150	M	C	3	Y	N	Y	N	Y	N	8	Y	N	Y	Y	N	N	Y	B	103092	0.1	100000	C	1784	L	L	L	Y	N	N
1	3769150	M	C	3	Y	N	Y	N	Y	N	8	Y	N	Y	Y	N	N	Y	B	103092	1	1000000	I	16296	L	L	L	N	N	N
1	3769150	M	C	3	Y	N	Y	N	Y	N	8	Y	N	Y	Y	N	N	Y	A	103092	9.7	160050	W	4337	L	L	L	N	N	N
2	1486033	M	C	5	Y	N	Y	N	Y	Y	9	Y	Y	N	N	N	Y	Y	A	500000	0.02	10000	M	96	S	L	L	N	N	N
2	1486033	M	C	5	Y	N	Y	N	Y	Y	9	Y	Y	N	N	N	Y	Y	A	500000	0.02	10000	R	5507	L	L	L	N	N	N
2	1486033	M	C	5	Y	N	Y	N	Y	Y	9	Y	Y	N	N	N	Y	Y	A	500000	0.02	10000	W	8	S	L	L	N	N	N
2	1486033	M	C	5	Y	N	Y	N	Y	Y	9	Y	Y	N	N	N	Y	Y	A	500000	0.02	10000	T	5	S	L	L	N	N	N
2	1486033	M	C	5	Y	N	Y	N	Y	Y	9	Y	Y	N	N	N	Y	Y	A	500000	0.02	10000	M	1535	L	L	L	N	N	N
2	1486033	M	C	5	Y	N	Y	N	Y	Y	9	Y	Y	N	N	N	Y	Y	A	500000	0.02	10000	S	10	S	L	L	N	N	N
2	1486033	M	C	5	Y	N	Y	N	Y	Y	9	Y	Y	N	N	N	Y	Y	A	500000	0.02	10000	S	5	S	L	L	N	N	N
2	1486033	M	C	5	Y	N	Y	N	Y	Y	9	Y	Y	N	N	N	Y	Y	A	500000	0.02	10000	M	10	S	L	L	N	N	N
2	1486033	M	C	5	Y	N	Y	N	Y	Y	9	Y	Y	N	N	N	Y	Y	A	500000	0.02	10000	M	811	M	L	L	N	N	Y
2	1486033	M	C	5	Y	N	Y	N	Y	Y	9	Y	Y	N	N	N	Y	Y	A	500000	0.02	10000	C	279	M	L	L	Y	N	Y
2	1486033	M	C	5	Y	N	Y	N	Y	Y	9	Y	Y	N	N	N	Y	Y	A	500000	0.4	200000	C	279	M	L	L	Y	N	Y
2	1486033	M	C	5	Y	N	Y	N	Y	Y	9	Y	Y	N	N	N	Y	Y	A	500000	0.1	50000	C	1784	L	O	O	Y	N	N
2	1486033	M	C	5	Y	N	Y	N	Y	Y	9	Y	Y	N	N	N	Y	Y	A	500000	0.1	50000	M	50	S	L	L	Y	N	Y
2	1486033	M	C	5	Y	N	Y	N	Y	Y	9	Y	Y	N	N	N	Y	Y	A	500000	0.1	50000	T	1243	L	O	O	Y	N	Y
2	1486033	M	C	5	Y	N	Y	N	Y	Y	9	Y	Y	N	N	N	Y	Y	A	500000	0.1	50000	M	12531	L	O	O	N	N	Y
2	1486033	M	C	5	Y	N	Y	N	Y	Y	9	Y	Y	N	N	N	Y	Y	A	500000	0.1	50000	C	50	S	L	L	N	N	Y
2	1486033	M	C	5	Y	N	Y	N	Y	Y	9	Y	Y	N	N	N	Y	Y	A	500000	0.02	10000	T	5	S	L	L	N	N	N
2	1486033	M	C	5	Y	N	Y	N	Y	Y	9	Y	Y	N	N	N	Y	Y	A	500000	0.02	10000	W	41	S	L	L	N	N	N
2	1486033	M	C	5	Y	N	Y	N	Y	Y	9	Y	Y	N	N	N	Y	Y	A	500000	0.02	10000	M	3350	L	L	L	N	N	Y
2	1486033	M	C	5	Y	N	Y	N	Y	Y	9	Y	Y	N	N	N	Y	Y	A	500000	0.02	10000	T	145	M	L	L	N	N	N
2	1486033	M	C	5	Y	N	Y	N	Y	Y	9	Y	Y	N	N	N	Y	Y	A	500000	0.02	10000	M	4258	L	L	L	N	N	N
2	1486033	M	C	5	Y	N	Y	N	Y	Y	9	Y	Y	N	N	N	Y	Y	A	500000	0.02	10000	M	1553	L	L	L	N	N	N
2	1486033	M	C	5	Y	N	Y	N	Y	Y	9	Y	Y	N	N	N	Y	Y	A	500000	0.02	10000	M	10	S	L	L	N	N	N
2	1486033	M	C	5	Y	N	Y	N	Y	Y	9	Y	Y	N	N	N	Y	Y	A	500000	0.02	10000	W	160	M	L	L	N	N	N
2	1486033	M	C	5	Y	N	Y	N	Y	Y	9	Y	Y	N	N	N	Y	Y	A	500000	0.02	10000	W	75	S	L	L	N	N	N
2	1486033	M	C	5	Y	N	Y	N	Y	Y	9	Y	Y	N	N	N	Y	Y	A	500000	0.02	10000	R	5507	L	L	L	N	N	N
2	1486033	M	C	5	Y	N	Y	N	Y	Y	9	Y	Y	N	N	N	Y	Y	A	500000	0.1	50000	S	10	S	L	L	N	N	N
2	1486033	M	C	5	Y	N	Y	N	Y	Y	9	Y	Y	N	N	N	Y	Y	A	500000	0.1	50000	C	279	M	L	L	Y	N	Y
2	1486033	M	C	5	Y	N	Y	N	Y	Y	9	Y	Y	N	N	N	Y	Y	A	500000	0.1	50000	M	96	S	L	L	N	N	N
2	1486033	M	C	5	Y	N	Y	N	Y	Y	9	Y	Y	N	N	N	Y	Y	A	500000	0.1	50000	W	30	S	L	L	N	N	N
2	1486033	M	C	5	Y	N	Y	N	Y	Y	9	Y	Y	N	N	N	Y	Y	A	500000	0.1	50000	S	5	S	L	L	N	N	N
2	1486033	M	C	5	Y	N	Y	N	Y	Y	9	Y	Y	N	N	N	Y	Y	A	500000	0.1	50000	M	10	S	L	L	Y	Y	N
2	1486033	M	C	5	Y	N	Y	N	Y	Y	9	Y	Y	N	N	N	Y	Y	A	500000	0.1	50000	M	811	M	L	L	N	N	Y
2	1486033	M	C	5	Y	N	Y	N	Y	Y	9	Y	Y	N	N	N	Y	Y	A	500000	0.1	50000	M	50	S	L	L	Y	N	Y
2	1486033	M	C	5	Y	N	Y	N	Y	Y	9	Y	Y	N	N	N	Y	Y	A	500000	0.1	50000	S	20	S	L	L	N	N	N
2	1486033	M	C	5	Y	N	Y	N	Y	Y	9	Y	Y	N	N	N	Y	Y	A	500000	0.1	50000	C	18	S	L	L	N	N	N
2	1486033	M	C	5	Y	N	Y	N	Y	Y	9	Y	Y	N	N	N	Y	Y	A	500000	0.1	50000	C	20	S	L	L	N	N	N
2	1486033	M	C	5	Y	N	Y	N	Y	Y	9	Y	Y	N	N	N	Y	Y	A	500000	0.1	50000	S	1101	L	O	O	N	N	N
2	1486033	M	C	5	Y	N	Y	N	Y	Y	9	Y	Y	N	N	N	Y	Y	A	500000	0.1	50000	S	203	M	O	O	N	N	N
2	1486033	M	C	5	Y	N	Y	N	Y	Y	9	Y	Y	N	N	N	Y	Y	A	500000	0.1	50000	C	1784	L	O	O	Y	N	N
2	1486033	M	C	5	Y	N	Y	N	Y	Y	9	Y	Y	N	N	N	Y	Y	A	500000	0.1	50000	C	700	M	O	O	Y	N	Y
2	1486033	M	C	5	Y	N	Y	N	Y	Y	9	Y	Y	N	N	N	Y	Y	A	500000	0.1	50000	C	50	S	L	L	N	N	Y
2	1486033	M	C	5	Y	N	Y	N	Y	Y	9	Y	Y	N	N	N	Y	Y	A	500000	0.1	50000	M	184	M	L	L	N	N	N
2	1486033	M	C	5	Y	N	Y	N	Y	Y	9	Y	Y	N	N	N	Y	Y	A	500000	0.1	50000	M	180	M	L	L	N	N	N
2	1486033	M	C	5	Y	N	Y	N	Y	Y	9	Y	Y	N	N	N	Y	Y	A	500000	0.1	50000	C	23	S	L	L	N	N	N
2	1486033	M	C	5	Y	N	Y	N	Y	Y	9	Y	Y	N	N	N	Y	Y	A	500000	0.1	50000	C	50	S	L	L	N	N	Y
2	1486033	M	C	5	Y	N	Y	N	Y	Y	9	Y	Y	N	N	N	Y	Y	A	500000	0.1	50000	S	20	S	L	L	N	N	N
2	1486033	M	C	5	Y	N	Y	N	Y	Y	9	Y	Y	N	N	N	Y	Y	A	500000	0.1	50000	M	50	S	L	L	Y	N	Y
2	1486033	M	C	5	Y	N	Y	N	Y	Y	9	Y	Y	N	N	N	Y	Y	A	500000	0.1	50000	C	18	S	L	L	N	N	N
2	1486033	M	C	5	Y	N	Y	N	Y	Y	9	Y	Y	N	N	N	Y	Y	A	500000	0.1	50000	C	20	S	L	L	N	N	N
2	1486033	M	C	5	Y	N	Y	N	Y	Y	9	Y	Y	N	N	N	Y	Y	A	500000	0.1	50000	S	1101	L	O	O	N	N	N
2	1486033	M	C	5	Y	N	Y	N	Y	Y	9	Y	Y	N	N	N	Y	Y	A	500000	0.1	50000	C	1528	L	P	O	N	N	N
2	1486033	M	C	5	Y	N	Y	N	Y	Y	9	Y	Y	N	N	N	Y	Y	A	500000	0.1	50000	C	783	M	O	O	N	N	Y
2	1486033	M	C	5	Y	N	Y	N	Y	Y	9	Y	Y	N	N	N	Y	Y	A	500000	0.1	50000	S	170	M	O	O	Y	N	N
2	1486033	M	C	5	Y	N	Y	N	Y	Y	9	Y	Y	N	N	N	Y	Y	A	500000	0.1	50000	C	1784	L	O	O	Y	N	N
2	1486033	M	C	5	Y	N	Y	N	Y	Y	9	Y	Y	N	N	N	Y	Y	A	500000	0.1	50000	C	23	S	O	O	N	N	N
2	1486033	M	C	5	Y	N	Y	N	Y	Y	9	Y	Y	N	N	N	Y	Y	A	500000	0.1	50000	C	700	M	L	L	Y	N	Y
2	1486033	M	C	5	Y	N	Y	N	Y	Y	9	Y	Y	N	N	N	Y	Y	A	500000	0.1	50000	M	1535	L	L	L	N	N	N
2	1486033	M	C	5	Y	N	Y	N	Y	Y	9	Y	Y	N	N	N	Y	Y	A	500000	0.1	50000	M	811	M	L	L	N	N	Y
2	1486033	M	C	5	Y	N	Y	N	Y	Y	9	Y	Y	N	N	N	Y	Y	A	500000	0.1	50000	M	10	S	L	L	Y	Y	N
2	1486033	M	C	5	Y	N	Y	N	Y	Y	9	Y	Y	N	N	N	Y	Y	A	500000	0.1	50000	C	279	M	L	L	Y	N	Y
2	1486033	M	C	5	Y	N	Y	N	Y	Y	9	Y	Y	N	N	N	Y	Y	A	500000	0.02	10000	M	96	S	L	L	N	N	N
2	1486033	M	C	5	Y	N	Y	N	Y	Y	9	Y	Y	N	N	N	Y	Y	A	500000	0.02	10000	R	5507	L	L	L	N	N	N
2	1486033	M	C	5	Y	N	Y	N	Y	Y	9	Y	Y	N	N	N	Y	Y	A	500000	0.02	10000	M	3350	L	L	L	N	N	Y
2	1486033	M	C	5	Y	N	Y	N	Y	Y	9	Y	Y	N	N	N	Y	Y	A	500000	0.02	10000	T	8200	L	L	L	N	N	N
2	1486033	M	C	5	Y	N	Y	N	Y	Y	9	Y	Y	N	N	N	Y	Y	A	500000	0.02	10000	M	10	S	L	L	N	N	N
2	1486033	M	C	5	Y	N	Y	N	Y	Y	9	Y	Y	N	N	N	Y	Y	A	500000	0.02	10000	S	5	S	L	L	N	N	N
2	1486033	M	C	5	Y	N	Y	N	Y	Y	9	Y	Y	N	N	N	Y	Y	A	500000	0.02	10000	W	4258	L	L	L	N	N	N
2	1486033	M	C	5	Y	N	Y	N	Y	Y	9	Y	Y	N	N	N	Y	Y	A	500000	0.02	10000	M	25	S	L	L	N	N	N
2	1486033	M	C	5	Y	N	Y	N	Y	Y	9	Y	Y	N	N	N	Y	Y	A	500000	0.02	10000	T	145	M	L	L	N	N	N
2	1486033	M	C	5	Y	N	Y	N	Y	Y	9	Y	Y	N	N	N	Y	Y	A	500000	0.02	10000	W	41	S	L	L	N	N	N
3	131936	M	C	4	Y	N	Y	Y	Y	N	7	Y	Y	Y	Y	N	Y	Y	A	45455	2.2	100000	S	452	M	L	L	N	N	Y
3	131936	M	C	4	Y	N	Y	Y	Y	N	7	Y	Y	Y	Y	N	Y	Y	A	45455	2.2	100000	C	1784	L	O	O	Y	N	N
3	131936	M	C	4	Y	N	Y	Y	Y	N	7	Y	Y	Y	Y	N	Y	Y	A	45455	2.2	100000	O	30	S	P	O	N	N	Y
3	131936	M	C	4	Y	N	Y	Y	Y	N	7	Y	Y	Y	Y	N	Y	Y	A	45455	2.2	100000	S	170	M	O	O	Y	N	N
3	131936	M	C	4	Y	N	Y	Y	Y	N	7	Y	Y	Y	Y	N	Y	Y	A	45455	2.2	100000	T	1243	L	O	O	Y	N	Y
3	131936	M	C	4	Y	N	Y	Y	Y	N	7	Y	Y	Y	Y	N	Y	Y	A	45455	2.2	100000	M	675	M	P	O	N	N	N
3	131936	M	C	4	Y	N	Y	Y	Y	N	7	Y	Y	Y	Y	N	Y	Y	A	45455	2.2	100000	S	650	M	O	O	N	N	N
3	131936	M	C	4	Y	N	Y	Y	Y	N	7	Y	Y	Y	Y	N	Y	Y	A	45455	6.6	300000	M	5782	L	L	L	N	N	Y
3	131936	M	C	4	Y	N	Y	Y	Y	N	7	Y	Y	Y	Y	N	Y	Y	A	45455	2.2	100000	I	16296	L	L	L	N	N	N
3	131936	M	C	4	Y	N	Y	Y	Y	N	7	Y	Y	Y	Y	N	Y	Y	A	45455	6.6	300000	M	14394	L	L	L	N	N	Y
3	131936	M	C	4	Y	N	Y	Y	Y	N	7	Y	Y	Y	Y	N	Y	Y	A	45455	2.2	100000	C	8	S	P	O	N	N	N
3	131936	M	C	4	Y	N	Y	Y	Y	N	7	Y	Y	Y	Y	N	Y	Y	A	45455	6.6	300000	E	4960	L	L	L	Y	N	N
3	131936	M	C	4	Y	N	Y	Y	Y	N	7	Y	Y	Y	Y	N	Y	Y	A	45455	2.2	100000	O	219	M	L	L	N	N	N
3	131936	M	C	4	Y	N	Y	Y	Y	N	7	Y	Y	Y	Y	N	Y	Y	A	45455	2.2	100000	S	204	M	O	O	N	N	Y
3	131936	M	C	4	Y	N	Y	Y	Y	N	7	Y	Y	Y	Y	N	Y	Y	A	83333	1.2	100000	C	1784	L	O	O	Y	N	N
3	131936	M	C	4	Y	N	Y	Y	Y	N	7	Y	Y	Y	Y	N	Y	Y	A	83333	1.2	100000	S	203	M	O	O	N	N	N
3	131936	M	C	4	Y	N	Y	Y	Y	N	7	Y	Y	Y	Y	N	Y	Y	A	83333	1.2	100000	T	258	M	O	O	N	N	N
3	131936	M	C	4	Y	N	Y	Y	Y	N	7	Y	Y	Y	Y	N	Y	Y	A	83333	3.8	300000	M	14394	L	L	L	N	N	Y
3	131936	M	C	4	Y	N	Y	Y	Y	N	7	Y	Y	Y	Y	N	Y	Y	A	83333	1.2	100000	O	30	S	P	O	N	N	Y
3	131936	M	C	4	Y	N	Y	Y	Y	N	7	Y	Y	Y	Y	N	Y	Y	A	83333	1.2	100000	S	170	M	O	O	Y	N	N
3	131936	M	C	4	Y	N	Y	Y	Y	N	7	Y	Y	Y	Y	N	Y	Y	A	83333	1.2	100000	S	452	M	L	L	N	N	Y
3	131936	M	C	4	Y	N	Y	Y	Y	N	7	Y	Y	Y	Y	N	Y	Y	A	83333	3.8	300000	E	4960	L	L	L	Y	N	N
3	131936	M	C	4	Y	N	Y	Y	Y	N	7	Y	Y	Y	Y	N	Y	Y	A	83333	3.8	300000	M	4462	L	L	L	N	N	N
3	131936	M	C	4	Y	N	Y	Y	Y	N	7	Y	Y	Y	Y	N	Y	Y	A	83333	1.2	100000	T	1243	L	O	O	Y	N	Y
3	131936	M	C	4	Y	N	Y	Y	Y	N	7	Y	Y	Y	Y	N	Y	Y	A	83333	3.8	300000	M	5782	L	L	L	N	N	Y
3	131936	M	C	4	Y	N	Y	Y	Y	N	7	Y	Y	Y	Y	N	Y	Y	A	83333	1.2	100000	O	163	M	L	L	N	N	N
3	131936	M	C	4	Y	N	Y	Y	Y	N	7	Y	Y	Y	Y	N	Y	Y	A	83333	1.2	100000	S	650	M	O	O	N	N	N
3	131936	M	C	4	Y	N	Y	Y	Y	N	7	Y	Y	Y	Y	N	Y	Y	A	83333	1.2	100000	S	204	M	O	O	N	N	Y
3	131936	M	C	4	Y	N	Y	Y	Y	N	7	Y	Y	Y	Y	N	Y	Y	A	83333	1.2	100000	C	11000	L	O	O	N	N	N
3	131936	M	C	4	Y	N	Y	Y	Y	N	7	Y	Y	Y	Y	N	Y	Y	A	83333	1.2	100000	M	219	M	L	L	N	N	N
3	131936	M	C	4	Y	N	Y	Y	Y	N	7	Y	Y	Y	Y	N	Y	Y	A	83333	1.2	100000	S	2791	L	O	O	N	N	N
3	131936	M	C	4	Y	N	Y	Y	Y	N	7	Y	Y	Y	Y	N	Y	Y	A	87097	3.1	270000	T	258	M	O	O	N	N	N
3	131936	M	C	4	Y	N	Y	Y	Y	N	7	Y	Y	Y	Y	N	Y	Y	A	87097	3.1	270000	O	219	M	L	L	N	N	N
3	131936	M	C	4	Y	N	Y	Y	Y	N	7	Y	Y	Y	Y	N	Y	Y	A	87097	3.1	270000	M	14394	L	L	L	N	N	Y
3	131936	M	C	4	Y	N	Y	Y	Y	N	7	Y	Y	Y	Y	N	Y	Y	A	87097	3.1	270000	E	4960	L	L	L	Y	N	N
3	131936	M	C	4	Y	N	Y	Y	Y	N	7	Y	Y	Y	Y	N	Y	Y	A	87097	3.1	270000	M	5782	L	L	L	N	N	Y
3	131936	M	C	4	Y	N	Y	Y	Y	N	7	Y	Y	Y	Y	N	Y	Y	A	87097	1	90000	O	30	S	P	O	N	N	Y
3	131936	M	C	4	Y	N	Y	Y	Y	N	7	Y	Y	Y	Y	N	Y	Y	A	87097	1	90000	S	650	M	O	O	N	N	N
3	131936	M	C	4	Y	N	Y	Y	Y	N	7	Y	Y	Y	Y	N	Y	Y	A	87097	1	90000	C	203	M	O	O	N	N	N
3	131936	M	C	4	Y	N	Y	Y	Y	N	7	Y	Y	Y	Y	N	Y	Y	A	87097	1	90000	C	5621	L	O	O	Y	N	Y
3	131936	M	C	4	Y	N	Y	Y	Y	N	7	Y	Y	Y	Y	N	Y	Y	A	87097	3.1	270000	M	4462	L	L	L	N	N	N
3	131936	M	C	4	Y	N	Y	Y	Y	N	7	Y	Y	Y	Y	N	Y	Y	A	87097	1	90000	S	170	M	O	O	Y	N	N
3	131936	M	C	4	Y	N	Y	Y	Y	N	7	Y	Y	Y	Y	N	Y	Y	A	87097	1	90000	S	452	M	P	O	N	N	Y
3	131936	M	C	4	Y	N	Y	Y	Y	N	7	Y	Y	Y	Y	N	Y	Y	A	87097	2	180000	C	1784	L	O	O	Y	N	N
3	131936	M	C	4	Y	N	Y	Y	Y	N	7	Y	Y	Y	Y	N	Y	Y	A	87097	1	90000	C	1784	L	O	O	Y	N	N
3	131936	M	C	4	Y	N	Y	Y	Y	N	7	Y	Y	Y	Y	N	Y	Y	A	87097	1	90000	O	163	M	L	L	N	N	N
3	131936	M	C	4	Y	N	Y	Y	Y	N	7	Y	Y	Y	Y	N	Y	Y	A	30612	9.8	300000	M	14394	L	L	L	N	N	Y
3	131936	M	C	4	Y	N	Y	Y	Y	N	7	Y	Y	Y	Y	N	Y	Y	A	30612	9.8	300000	M	4462	L	L	L	N	N	N
3	131936	M	C	4	Y	N	Y	Y	Y	N	7	Y	Y	Y	Y	N	Y	Y	A	30612	3.2	100000	S	203	M	O	O	N	N	N
3	131936	M	C	4	Y	N	Y	Y	Y	N	7	Y	Y	Y	Y	N	Y	Y	A	30612	3.2	100000	C	5621	L	O	O	Y	N	Y
3	131936	M	C	4	Y	N	Y	Y	Y	N	7	Y	Y	Y	Y	N	Y	Y	A	30612	9.8	300000	T	258	M	O	O	N	N	N
3	131936	M	C	4	Y	N	Y	Y	Y	N	7	Y	Y	Y	Y	N	Y	Y	A	30612	3.2	100000	O	30	S	P	O	N	N	Y
3	131936	M	C	4	Y	N	Y	Y	Y	N	7	Y	Y	Y	Y	N	Y	Y	A	30612	3.2	100000	S	452	M	P	O	N	N	Y
3	131936	M	C	4	Y	N	Y	Y	Y	N	7	Y	Y	Y	Y	N	Y	Y	A	30612	3.2	100000	T	680	M	O	O	N	N	N
3	131936	M	C	4	Y	N	Y	Y	Y	N	7	Y	Y	Y	Y	N	Y	Y	A	30612	3.2	100000	M	23936	L	L	L	N	N	N
3	131936	M	C	4	Y	N	Y	Y	Y	N	7	Y	Y	Y	Y	N	Y	Y	A	30612	9.8	300000	O	219	M	L	L	N	N	N
3	131936	M	C	4	Y	N	Y	Y	Y	N	7	Y	Y	Y	Y	N	Y	Y	A	30612	3.2	100000	O	922	M	L	L	N	N	Y
3	131936	M	C	4	Y	N	Y	Y	Y	N	7	Y	Y	Y	Y	N	Y	Y	A	30612	9.8	300000	M	5782	L	L	L	N	N	Y
3	131936	M	C	4	Y	N	Y	Y	Y	N	7	Y	Y	Y	Y	N	Y	Y	A	30612	6.5	200000	C	1784	L	O	O	Y	N	N
3	131936	M	C	4	Y	N	Y	Y	Y	N	7	Y	Y	Y	Y	N	Y	Y	A	30612	3.2	100000	S	170	M	O	O	Y	N	N
3	131936	M	C	4	Y	N	Y	Y	Y	N	7	Y	Y	Y	Y	N	Y	Y	A	30612	9.8	300000	E	4960	L	L	L	Y	N	N
3	131936	M	C	4	Y	N	Y	Y	Y	N	7	Y	Y	Y	Y	N	Y	Y	A	30612	3.2	100000	O	163	M	L	L	N	N	N
4	1486033	SW	C	1	N	N	N	Y	N	N	25	N	N	N	Y	N	Y	Y	A	250000	0.2	50000	M	184	M	L	L	N	N	N
4	1486033	SW	C	1	N	N	N	Y	N	N	25	N	N	N	Y	N	Y	Y	A	250000	0.2	50000	M	180	M	L	L	N	N	N
4	1486033	SW	C	1	N	N	N	Y	N	N	25	N	N	N	Y	N	Y	Y	A	250000	0.2	50000	C	1784	L	O	O	Y	N	N
4	1486033	SW	C	1	N	N	N	Y	N	N	25	N	N	N	Y	N	Y	Y	A	250000	3.9	900000	M	889	M	L	L	Y	N	Y
4	1486033	SW	C	1	N	N	N	Y	N	N	25	N	N	N	Y	N	Y	Y	A	250000	0.2	50000	T	1243	L	O	O	Y	N	Y
4	1486033	SW	C	1	N	N	N	Y	N	N	25	N	N	N	Y	N	Y	Y	A	250000	0.2	50000	M	70	S	L	L	N	N	N
4	1486033	SW	C	1	N	N	N	Y	N	N	25	N	N	N	Y	N	Y	Y	A	250000	0.2	50000	C	279	M	L	L	Y	N	Y
4	1486033	SW	C	1	N	N	N	Y	N	N	25	N	N	N	Y	N	Y	Y	A	250000	1.1	250000	C	1528	L	O	O	N	N	N
4	1486033	SW	C	1	N	N	N	Y	N	N	25	N	N	N	Y	N	Y	Y	A	250000	0.2	50000	C	36	S	L	L	N	N	N
4	1486033	SW	C	1	N	N	N	Y	N	N	25	N	N	N	Y	N	Y	Y	A	250000	0.2	50000	T	300	M	L	L	Y	N	N
4	1486033	SW	C	1	N	N	N	Y	N	N	25	N	N	N	Y	N	Y	Y	A	250000	1.1	250000	C	20	S	L	L	N	N	N
4	1486033	SW	C	1	N	N	N	Y	N	N	25	N	N	N	Y	N	Y	Y	A	250000	0.4	100000	T	12	S	L	L	N	N	N
4	1486033	SW	C	1	N	N	N	Y	N	N	25	N	N	N	Y	N	Y	Y	A	250000	0.2	50000	C	11000	L	O	O	N	N	N
4	1486033	SW	C	1	N	N	N	Y	N	N	25	N	N	N	Y	N	Y	Y	A	250000	0.4	100000	R	1094	L	L	L	N	N	N
4	1486033	SW	C	1	N	N	N	Y	N	N	25	N	N	N	Y	N	Y	Y	A	250000	0.2	50000	W	4337	L	O	O	N	N	N
5	41970	SW	R	2	Y	N	Y	Y	N	N	28	N	Y	N	Y	N	Y	Y	A	71429	1.4	100000	M	117	M	P	O	N	N	N
5	41970	SW	R	2	Y	N	Y	Y	N	N	28	N	Y	N	Y	N	Y	Y	A	71429	1.4	100000	M	249	M	P	O	N	N	N
5	41970	SW	R	2	Y	N	Y	Y	N	N	28	N	Y	N	Y	N	Y	Y	A	71429	1.4	100000	T	1243	L	O	O	Y	N	Y
5	41970	SW	R	2	Y	N	Y	Y	N	N	28	N	Y	N	Y	N	Y	Y	A	71429	1.4	100000	T	12	S	P	O	N	N	N
5	41970	SW	R	2	Y	N	Y	Y	N	N	28	N	Y	N	Y	N	Y	Y	A	71429	1.4	100000	C	1784	L	O	O	Y	N	N
5	41970	SW	R	2	Y	N	Y	Y	N	N	28	N	Y	N	Y	N	Y	Y	A	71429	1.4	100000	T	1146	L	P	O	Y	N	Y
5	41970	SW	R	2	Y	N	Y	Y	N	N	28	N	Y	N	Y	N	Y	Y	A	71429	1.4	100000	T	188	M	P	O	N	N	N
5	41970	SW	R	2	Y	N	Y	Y	N	N	28	N	Y	N	Y	N	Y	Y	A	71429	1.4	100000	M	133	M	P	O	N	N	N
5	41970	SW	R	2	Y	N	Y	Y	N	N	28	N	Y	N	Y	N	Y	Y	A	71429	2.9	200000	E	10	S	P	O	N	N	N
5	41970	SW	R	2	Y	N	Y	Y	N	N	28	N	Y	N	Y	N	Y	Y	A	71429	1.4	100000	M	3368	L	P	O	N	N	N
5	41970	SW	R	2	Y	N	Y	Y	N	N	28	N	Y	N	Y	N	Y	Y	A	71429	4.4	300000	E	3180	L	P	O	N	N	Y
5	41970	SW	R	2	Y	N	Y	Y	N	N	28	N	Y	N	Y	N	Y	Y	A	71429	1.4	100000	C	85	S	P	O	N	N	Y
5	41970	SW	R	2	Y	N	Y	Y	N	N	28	N	Y	N	Y	N	Y	Y	A	71429	1.4	100000	M	137	M	P	O	N	N	N
5	41970	SW	R	2	Y	N	Y	Y	N	N	28	N	Y	N	Y	N	Y	Y	A	71429	1.4	100000	C	10	S	P	O	N	N	N
5	41970	SW	R	2	Y	N	Y	Y	N	N	28	N	Y	N	Y	N	Y	Y	A	71429	1.4	100000	C	47	S	P	O	N	N	N
5	41970	SW	R	2	Y	N	Y	Y	N	N	28	N	Y	N	Y	N	Y	Y	A	71429	1.4	100000	C	11000	L	P	O	N	N	N
5	41970	SW	R	2	Y	N	Y	Y	N	N	28	N	Y	N	Y	N	Y	Y	A	71429	1.4	100000	O	50	S	P	O	N	N	Y
5	41970	SW	R	2	Y	N	Y	Y	N	N	28	N	Y	N	Y	N	Y	Y	A	71429	1.4	100000	C	850	M	O	O	Y	N	Y
5	41970	SW	R	2	Y	N	Y	Y	N	N	28	N	Y	N	Y	N	Y	Y	A	71429	7.4	500000	E	20	S	O	O	Y	N	N
5	41970	SW	R	2	Y	N	Y	Y	N	N	28	N	Y	N	Y	N	Y	Y	A	71429	1.4	100000	O	729	M	P	O	Y	Y	Y
5	41970	SW	R	2	Y	N	Y	Y	N	N	28	N	Y	N	Y	N	Y	Y	A	71429	1.4	100000	M	272	M	P	O	Y	N	N
5	41970	SW	R	2	Y	N	Y	Y	N	N	28	N	Y	N	Y	N	Y	Y	A	71429	1.4	100000	C	83	S	P	O	N	N	Y
5	41970	SW	R	2	Y	N	Y	Y	N	N	28	N	Y	N	Y	N	Y	Y	A	71429	1.4	100000	T	41	S	P	O	N	N	N
5	41970	SW	R	2	Y	N	Y	Y	N	N	28	N	Y	N	Y	N	Y	Y	A	71429	1.4	100000	C	292	M	P	O	N	N	N
5	41970	SW	R	2	Y	N	Y	Y	N	N	28	N	Y	N	Y	N	Y	Y	A	71429	1.4	100000	M	240	M	P	O	N	N	N
5	41970	SW	R	2	Y	N	Y	Y	N	N	28	N	Y	N	Y	N	Y	Y	A	71429	1.4	100000	E	1464	L	P	O	Y	N	Y
5	41970	SW	R	2	Y	N	Y	Y	N	N	28	N	Y	N	Y	N	Y	Y	A	90000	1	90000	M	117	M	P	O	N	N	N
5	41970	SW	R	2	Y	N	Y	Y	N	N	28	N	Y	N	Y	N	Y	Y	A	90000	1	90000	C	85	S	P	O	N	N	Y
5	41970	SW	R	2	Y	N	Y	Y	N	N	28	N	Y	N	Y	N	Y	Y	A	90000	1	90000	C	47	S	P	O	N	N	N
5	41970	SW	R	2	Y	N	Y	Y	N	N	28	N	Y	N	Y	N	Y	Y	A	90000	1	90000	T	12	S	P	O	N	N	N
5	41970	SW	R	2	Y	N	Y	Y	N	N	28	N	Y	N	Y	N	Y	Y	A	90000	1	90000	C	83	S	P	O	N	N	Y
5	41970	SW	R	2	Y	N	Y	Y	N	N	28	N	Y	N	Y	N	Y	Y	A	90000	1	90000	O	50	S	P	O	N	N	Y
5	41970	SW	R	2	Y	N	Y	Y	N	N	28	N	Y	N	Y	N	Y	Y	A	90000	1	90000	E	3180	L	P	O	N	N	Y
5	41970	SW	R	2	Y	N	Y	Y	N	N	28	N	Y	N	Y	N	Y	Y	A	90000	1	90000	M	249	M	P	O	N	N	N
5	41970	SW	R	2	Y	N	Y	Y	N	N	28	N	Y	N	Y	N	Y	Y	A	90000	3	270000	E	20	S	O	O	Y	N	N
5	41970	SW	R	2	Y	N	Y	Y	N	N	28	N	Y	N	Y	N	Y	Y	A	90000	4	360000	E	10	S	P	O	N	N	N
5	41970	SW	R	2	Y	N	Y	Y	N	N	28	N	Y	N	Y	N	Y	Y	A	90000	1	90000	O	729	M	P	O	Y	Y	Y
5	41970	SW	R	2	Y	N	Y	Y	N	N	28	N	Y	N	Y	N	Y	Y	A	90000	1	90000	T	1146	L	P	O	Y	N	Y
5	41970	SW	R	2	Y	N	Y	Y	N	N	28	N	Y	N	Y	N	Y	Y	A	90000	1	90000	E	1464	L	P	O	Y	N	Y
5	41970	SW	R	2	Y	N	Y	Y	N	N	28	N	Y	N	Y	N	Y	Y	A	90000	1	90000	I	2601	L	P	O	Y	N	N
5	41970	SW	R	2	Y	N	Y	Y	N	N	28	N	Y	N	Y	N	Y	Y	A	90000	1	90000	M	112	M	P	O	N	N	N
6	29479	SG	C	2	N	N	N	Y	Y	N	6	Y	Y	Y	Y	N	Y	Y	A	500000	0.1	50000	S	203	M	P	O	N	N	N
6	29479	SG	C	2	N	N	N	Y	Y	N	6	Y	Y	Y	Y	N	Y	Y	A	500000	0.2	100000	C	1784	L	O	O	Y	N	N
6	29479	SG	C	2	N	N	N	Y	Y	N	6	Y	Y	Y	Y	N	Y	Y	A	500000	0.1	50000	S	17	S	P	O	N	N	N
6	29479	SG	C	2	N	N	N	Y	Y	N	6	Y	Y	Y	Y	N	Y	Y	A	500000	0.1	50000	T	1243	L	O	O	Y	N	Y
6	29479	SG	C	2	N	N	N	Y	Y	N	6	Y	Y	Y	Y	N	Y	Y	A	500000	0.1	50000	T	12	S	L	L	N	N	N
6	29479	SG	C	2	N	N	N	Y	Y	N	6	Y	Y	Y	Y	N	Y	Y	A	500000	0.1	50000	T	1146	L	L	L	Y	N	Y
6	29479	SG	C	2	N	N	N	Y	Y	N	6	Y	Y	Y	Y	N	Y	Y	A	500000	0.1	50000	C	322	M	O	O	N	N	Y
6	29479	SG	C	2	N	N	N	Y	Y	N	6	Y	Y	Y	Y	N	Y	Y	A	500000	0.1	50000	C	279	M	O	O	Y	N	Y
6	29479	SG	C	2	N	N	N	Y	Y	N	6	Y	Y	Y	Y	N	Y	Y	A	500000	0.1	50000	T	248	M	P	O	N	N	N
6	29479	SG	C	2	N	N	N	Y	Y	N	6	Y	Y	Y	Y	N	Y	Y	A	62500	0.8	50000	S	203	M	O	O	N	N	N
6	29479	SG	C	2	N	N	N	Y	Y	N	6	Y	Y	Y	Y	N	Y	Y	A	500000	0.1	50000	T	248	M	P	O	N	N	N
6	29479	SG	C	2	N	N	N	Y	Y	N	6	Y	Y	Y	Y	N	Y	Y	A	500000	0.1	50000	T	12	S	L	L	N	N	N
6	29479	SG	C	2	N	N	N	Y	Y	N	6	Y	Y	Y	Y	N	Y	Y	A	500000	0.1	50000	C	85	S	P	O	N	N	Y
6	29479	SG	C	2	N	N	N	Y	Y	N	6	Y	Y	Y	Y	N	Y	Y	A	500000	0.1	50000	C	126	M	P	O	N	N	N
6	29479	SG	C	2	N	N	N	Y	Y	N	6	Y	Y	Y	Y	N	Y	Y	A	500000	0.1	50000	C	83	S	P	O	N	N	Y
6	29479	SG	C	2	N	N	N	Y	Y	N	6	Y	Y	Y	Y	N	Y	Y	A	500000	0.1	50000	C	292	M	P	O	N	N	N
6	29479	SG	C	2	N	N	N	Y	Y	N	6	Y	Y	Y	Y	N	Y	Y	A	500000	0.1	50000	C	850	M	O	O	Y	N	Y
6	29479	SG	C	2	N	N	N	Y	Y	N	6	Y	Y	Y	Y	N	Y	Y	A	500000	0.2	100000	C	1528	L	O	O	N	N	N
7	1170275	M	M	2	Y	N	N	Y	N	N	37	N	N	Y	Y	N	Y	Y	A	125000	1.2	150000	C	1784	L	L	L	Y	N	N
7	1170275	M	M	2	Y	N	N	Y	N	N	37	N	N	Y	Y	N	Y	Y	A	125000	0.4	50000	O	256	M	P	O	N	N	Y
7	1170275	M	M	2	Y	N	N	Y	N	N	37	N	N	Y	Y	N	Y	Y	A	125000	0.4	50000	S	452	M	L	L	N	N	Y
7	1170275	M	M	2	Y	N	N	Y	N	N	37	N	N	Y	Y	N	Y	Y	A	125000	0.4	50000	T	1243	L	L	L	Y	N	Y
7	1170275	M	M	2	Y	N	N	Y	N	N	37	N	N	Y	Y	N	Y	Y	A	100000	1	100000	C	5621	L	L	L	Y	N	Y
7	1170275	M	M	2	Y	N	N	Y	N	N	37	N	N	Y	Y	N	Y	Y	A	100000	3.2	300000	C	1784	L	L	L	Y	N	N
7	1170275	M	M	2	Y	N	N	Y	N	N	37	N	N	Y	Y	N	Y	Y	A	100000	1	100000	M	12964	L	O	O	N	N	Y
8	113179	SW	R	2	Y	N	N	N	Y	N	14	N	Y	Y	Y	N	Y	Y	A	12195	8.2	100000	T	1243	L	O	O	Y	N	Y
8	113179	SW	R	2	Y	N	N	N	Y	N	14	N	Y	Y	Y	N	Y	Y	A	12195	8.2	100000	C	11000	L	O	O	N	N	N
8	113179	SW	R	2	Y	N	N	N	Y	N	14	N	Y	Y	Y	N	Y	Y	A	12195	8.2	100000	M	451	M	O	O	N	N	N
8	113179	SW	R	2	Y	N	N	N	Y	N	14	N	Y	Y	Y	N	Y	Y	A	12195	8.2	100000	E	5	S	L	L	N	N	Y
8	113179	SW	R	2	Y	N	N	N	Y	N	14	N	Y	Y	Y	N	Y	Y	A	12195	8.2	100000	O	2	S	P	O	Y	N	Y
8	113179	SW	R	2	Y	N	N	N	Y	N	14	N	Y	Y	Y	N	Y	Y	A	5114	17.6	90000	O	2	S	P	O	Y	N	Y
8	113179	SW	R	2	Y	N	N	N	Y	N	14	N	Y	Y	Y	N	Y	Y	F	15254	2	100000	R	2422	L	O	O	N	N	N
8	113179	SW	R	2	Y	N	N	N	Y	N	14	N	Y	Y	Y	N	Y	Y	F	50000	4	200000	C	1784	L	O	O	Y	N	N
8	113179	SW	R	2	Y	N	N	N	Y	N	14	N	Y	Y	Y	N	Y	Y	F	50000	2	100000	O	2	S	P	O	Y	N	Y
9	31693	SW	R	5	Y	Y	Y	N	N	Y	17	Y	Y	Y	Y	Y	Y	Y	A	81081	3.7	300000	C	160	M	P	O	N	N	N
9	31693	SW	R	5	Y	Y	Y	N	N	Y	17	Y	Y	Y	Y	Y	Y	Y	A	81081	1.2	100000	S	5	S	P	O	N	N	N
9	31693	SW	R	5	Y	Y	Y	N	N	Y	17	Y	Y	Y	Y	Y	Y	Y	A	81081	1.2	100000	C	1784	L	O	O	Y	N	N
9	31693	SW	R	5	Y	Y	Y	N	N	Y	17	Y	Y	Y	Y	Y	Y	Y	A	81081	3.7	300000	S	71	S	P	O	N	N	N
9	31693	SW	R	5	Y	Y	Y	N	N	Y	17	Y	Y	Y	Y	Y	Y	Y	A	81081	3.7	300000	S	20	S	O	O	N	N	N
9	31693	SW	R	5	Y	Y	Y	N	N	Y	17	Y	Y	Y	Y	Y	Y	Y	A	81081	1.2	100000	T	1243	L	O	O	Y	N	Y
9	31693	SW	R	5	Y	Y	Y	N	N	Y	17	Y	Y	Y	Y	Y	Y	Y	A	81081	1.2	100000	S	5	S	L	L	N	N	N
9	31693	SW	R	5	Y	Y	Y	N	N	Y	17	Y	Y	Y	Y	Y	Y	Y	A	81081	1.2	100000	O	7	S	O	O	N	N	N
9	31693	SW	R	5	Y	Y	Y	N	N	Y	17	Y	Y	Y	Y	Y	Y	Y	A	81081	6.2	500000	C	8219	L	L	L	Y	N	Y
9	31693	SW	R	5	Y	Y	Y	N	N	Y	17	Y	Y	Y	Y	Y	Y	Y	A	81081	2.5	200000	W	8	S	O	O	N	N	N
9	31693	SW	R	5	Y	Y	Y	N	N	Y	17	Y	Y	Y	Y	Y	Y	Y	A	81081	12.5	1000000	E	1051	L	O	O	N	N	N
9	31693	SW	R	5	Y	Y	Y	N	N	Y	17	Y	Y	Y	Y	Y	Y	Y	A	81081	1.2	100000	S	170	M	O	O	Y	N	N
9	31693	SW	R	5	Y	Y	Y	N	N	Y	17	Y	Y	Y	Y	Y	Y	Y	A	81081	1.2	100000	M	15	S	O	O	N	N	N
9	31693	SW	R	5	Y	Y	Y	N	N	Y	17	Y	Y	Y	Y	Y	Y	Y	A	81081	1.2	100000	E	304	M	O	O	Y	N	Y
9	31693	SW	R	5	Y	Y	Y	N	N	Y	17	Y	Y	Y	Y	Y	Y	Y	A	81081	2.5	200000	R	51	S	L	L	N	N	N
9	31693	SW	R	5	Y	Y	Y	N	N	Y	17	Y	Y	Y	Y	Y	Y	Y	A	81081	1.2	100000	M	99	S	O	O	N	N	N
10	49858	SG	R	5	Y	N	N	Y	Y	N	18	Y	Y	Y	Y	N	Y	Y	A	176471	1.7	300000	R	8333	L	L	L	N	N	N
10	49858	SG	R	5	Y	N	N	Y	Y	N	18	Y	Y	Y	Y	N	Y	Y	A	176471	1.4	250000	W	50	S	P	O	N	N	Y
10	49858	SG	R	5	Y	N	N	Y	Y	N	18	Y	Y	Y	Y	N	Y	Y	A	176471	0.2	50000	O	2195	L	O	O	Y	Y	Y
10	49858	SG	R	5	Y	N	N	Y	Y	N	18	Y	Y	Y	Y	N	Y	Y	A	5000	20	100000	W	50	S	P	O	N	N	Y
11	123483	M	M	4	Y	Y	N	Y	N	Y	11	N	Y	N	Y	N	Y	Y	B	200000	1	200000	C	1784	L	O	O	Y	N	N
11	123483	M	M	4	Y	Y	N	Y	N	Y	11	N	Y	N	Y	N	Y	Y	A	16071	5.6	90000	M	233	M	P	O	N	N	N
11	123483	M	M	4	Y	Y	N	Y	N	Y	11	N	Y	N	Y	N	Y	Y	A	16071	17	270000	S	145	M	P	O	N	N	N
11	123483	M	M	4	Y	Y	N	Y	N	Y	11	N	Y	N	Y	N	Y	Y	A	16071	11.3	180000	C	1784	L	P	O	Y	N	N
11	123483	M	M	4	Y	Y	N	Y	N	Y	11	N	Y	N	Y	N	Y	Y	A	16071	5.6	90000	S	17	S	O	O	N	N	N
11	123483	M	M	4	Y	Y	N	Y	N	Y	11	N	Y	N	Y	N	Y	Y	A	181818	1.1	200000	C	1784	L	O	O	Y	N	N
11	123483	M	M	4	Y	Y	N	Y	N	Y	11	N	Y	N	Y	N	Y	Y	A	2558	39.1	100000	C	11000	L	O	O	N	N	N
11	123483	M	M	4	Y	Y	N	Y	N	Y	11	N	Y	N	Y	N	Y	Y	A	142857	0.7	100000	S	1646	L	O	O	N	N	N
12	10376	SW	R	3	Y	N	N	Y	Y	N	9	Y	N	Y	N	N	Y	Y	F	200000	0.5	100000	T	37	S	O	O	N	N	N
12	10376	SW	R	3	Y	N	N	Y	Y	N	9	Y	N	Y	N	N	Y	Y	F	200000	1.5	300000	E	3180	L	O	O	N	Y	Y
12	10376	SW	R	3	Y	N	N	Y	Y	N	9	Y	N	Y	N	N	Y	Y	F	100000	1	100000	C	1784	L	O	O	Y	N	N
12	10376	SW	R	3	Y	N	N	Y	Y	N	9	Y	N	Y	N	N	Y	Y	F	100000	0.5	50000	E	3180	L	O	O	N	N	Y
12	10376	SW	R	3	Y	N	N	Y	Y	N	9	Y	N	Y	N	N	Y	Y	F	100000	2	200000	C	1528	L	O	O	N	N	N
12	10376	SW	R	3	Y	N	N	Y	Y	N	9	Y	N	Y	N	N	Y	Y	F	100000	1	100000	C	1784	L	O	O	Y	N	N
12	10376	SW	R	3	Y	N	N	Y	Y	N	9	Y	N	Y	N	N	Y	Y	F	100000	1	100000	C	1784	L	O	O	Y	N	N
12	10376	SW	R	3	Y	N	N	Y	Y	N	9	Y	N	Y	N	N	Y	Y	F	100000	1	100000	T	37	S	O	O	N	N	N
12	10376	SW	R	3	Y	N	N	Y	Y	N	9	Y	N	Y	N	N	Y	Y	F	100000	0.5	50000	C	1784	L	O	O	Y	N	N
14	126361	M	C	2	Y	N	N	Y	N	N	11	N	Y	Y	Y	N	Y	Y	A	153846	1.3	200000	W	339	M	L	L	N	N	N
14	126361	M	C	2	Y	N	N	Y	N	N	11	N	Y	Y	Y	N	Y	Y	A	153846	1.3	200000	C	1784	L	P	O	Y	N	N
14	126361	M	C	2	Y	N	N	Y	N	N	11	N	Y	Y	Y	N	Y	Y	A	153846	2	300000	S	1101	L	P	O	N	N	N
14	126361	M	C	2	Y	N	N	Y	N	N	11	N	Y	Y	Y	N	Y	Y	A	153846	6.8	1000000	M	220	M	L	L	N	N	N
14	126361	M	C	2	Y	N	N	Y	N	N	11	N	Y	Y	Y	N	Y	Y	A	153846	2	300000	M	207	M	P	O	N	N	Y
14	126361	M	C	2	Y	N	N	Y	N	N	11	N	Y	Y	Y	N	Y	Y	A	153846	1.3	200000	M	30	S	L	L	N	N	N
14	126361	M	C	2	Y	N	N	Y	N	N	11	N	Y	Y	Y	N	Y	Y	A	153846	0.6	100000	E	654	M	L	L	Y	N	N
14	126361	M	C	2	Y	N	N	Y	N	N	11	N	Y	Y	Y	N	Y	Y	A	153846	1.3	200000	W	23	S	L	L	N	N	N
14	126361	M	C	2	Y	N	N	Y	N	N	11	N	Y	Y	Y	N	Y	Y	A	153846	0.6	100000	M	461	M	L	L	N	N	N
14	126361	M	C	2	Y	N	N	Y	N	N	11	N	Y	Y	Y	N	Y	Y	A	153846	6.8	1000000	M	1768	L	L	L	N	N	N
14	126361	M	C	2	Y	N	N	Y	N	N	11	N	Y	Y	Y	N	Y	Y	A	153846	1.3	200000	S	1762	L	O	O	N	N	Y
14	126361	M	C	2	Y	N	N	Y	N	N	11	N	Y	Y	Y	N	Y	Y	A	153846	1.3	200000	I	68072	L	O	O	N	N	Y
14	126361	M	C	2	Y	N	N	Y	N	N	11	N	Y	Y	Y	N	Y	Y	A	153846	3.4	500000	I	3180	L	P	O	N	N	N
14	126361	M	C	2	Y	N	N	Y	N	N	11	N	Y	Y	Y	N	Y	Y	B	66667	1.5	100000	E	654	M	L	L	Y	N	N
14	126361	M	C	2	Y	N	N	Y	N	N	11	N	Y	Y	Y	N	Y	Y	B	66667	1	110000	S	204	M	P	O	N	N	N
14	126361	M	C	2	Y	N	N	Y	N	N	11	N	Y	Y	Y	N	Y	Y	B	66667	1	100000	S	203	M	O	O	N	N	N
14	126361	M	C	2	Y	N	N	Y	N	N	11	N	Y	Y	Y	N	Y	Y	B	100000	1	100000	M	147	M	P	O	N	N	Y
14	126361	M	C	2	Y	N	N	Y	N	N	11	N	Y	Y	Y	N	Y	Y	B	100000	1	100000	E	654	M	L	L	Y	N	N
14	126361	M	C	2	Y	N	N	Y	N	N	11	N	Y	Y	Y	N	Y	Y	B	100000	10	500000	I	68072	L	P	O	N	N	Y
14	126361	M	C	2	Y	N	N	Y	N	N	11	N	Y	Y	Y	N	Y	Y	B	100000	10	100000	I	3180	L	P	O	N	N	N
14	126361	M	C	2	Y	N	N	Y	N	N	11	N	Y	Y	Y	N	Y	Y	A	5806	15.5	90000	I	279	M	P	O	N	N	N
14	126361	M	C	2	Y	N	N	Y	N	N	11	N	Y	Y	Y	N	Y	Y	A	5806	31	180000	C	1784	L	P	O	Y	N	N
14	126361	M	C	2	Y	N	N	Y	N	N	11	N	Y	Y	Y	N	Y	Y	A	12587	14.3	180000	S	1762	L	O	O	N	N	Y
14	126361	M	C	2	Y	N	N	Y	N	N	11	N	Y	Y	Y	N	Y	Y	A	12587	14.3	180000	O	256	M	L	L	N	N	Y
14	126361	M	C	2	Y	N	N	Y	N	N	11	N	Y	Y	Y	N	Y	Y	F	50000	10	500000	R	1224	L	O	O	N	N	Y
14	126361	M	C	2	Y	N	N	Y	N	N	11	N	Y	Y	Y	N	Y	Y	F	50000	2	100000	M	147	M	P	O	N	N	Y
14	126361	M	C	2	Y	N	N	Y	N	N	11	N	Y	Y	Y	N	Y	Y	F	50000	10	500000	M	461	M	L	L	N	N	N
14	126361	M	C	2	Y	N	N	Y	N	N	11	N	Y	Y	Y	N	Y	Y	F	50000	1.8	90000	S	1101	L	P	O	N	N	N
14	126361	M	C	2	Y	N	N	Y	N	N	11	N	Y	Y	Y	N	Y	Y	F	50000	2	100000	M	30	S	L	L	N	N	N
14	126361	M	C	2	Y	N	N	Y	N	N	11	N	Y	Y	Y	N	Y	Y	F	50000	1	50000	S	10	S	L	L	N	N	N
14	126361	M	C	2	Y	N	N	Y	N	N	11	N	Y	Y	Y	N	Y	Y	A	2315	21.6	50000	T	10	S	L	L	N	N	Y
14	126361	M	C	2	Y	N	N	Y	N	N	11	N	Y	Y	Y	N	Y	Y	A	90909	1.1	100000	W	339	M	L	L	N	N	N
14	126361	M	C	2	Y	N	N	Y	N	N	11	N	Y	Y	Y	N	Y	Y	A	90909	2.2	200000	W	184	M	L	L	N	N	N
14	126361	M	C	2	Y	N	N	Y	N	N	11	N	Y	Y	Y	N	Y	Y	A	90909	11.3	1000000	M	1768	L	L	L	N	N	N
14	126361	M	C	2	Y	N	N	Y	N	N	11	N	Y	Y	Y	N	Y	Y	A	90909	3.4	300000	C	1784	L	P	O	Y	N	N
14	126361	M	C	2	Y	N	N	Y	N	N	11	N	Y	Y	Y	N	Y	Y	A	90909	1.1	100000	S	1762	L	O	O	N	N	Y
14	126361	M	C	2	Y	N	N	Y	N	N	11	N	Y	Y	Y	N	Y	Y	A	90909	1.1	100000	W	4337	L	O	O	N	N	N
14	126361	M	C	2	Y	N	N	Y	N	N	11	N	Y	Y	Y	N	Y	Y	A	90909	1.1	100000	O	256	M	L	L	N	N	Y
15	31667	SW	R	5	Y	Y	Y	Y	Y	N	8	Y	Y	Y	Y	N	Y	Y	A	41667	2.4	100000	S	1314	L	P	O	Y	N	Y
15	31667	SW	R	5	Y	Y	Y	Y	Y	N	8	Y	Y	Y	Y	N	Y	Y	A	41667	2.4	100000	M	1254	L	O	O	N	N	N
15	31667	SW	R	5	Y	Y	Y	Y	Y	N	8	Y	Y	Y	Y	N	Y	Y	A	41667	7.2	300000	S	8919	L	O	O	N	N	N
16	23399	SW	R	5	Y	N	Y	Y	N	N	5	N	Y	Y	N	Y	Y	Y	A	3659	24.6	90000	S	452	M	O	O	N	N	Y
16	23399	SW	R	5	Y	N	Y	Y	N	N	5	N	Y	Y	N	Y	Y	Y	F	90000	1	90000	S	452	M	O	O	N	N	Y
16	23399	SW	R	5	Y	N	Y	Y	N	N	5	N	Y	Y	N	Y	Y	Y	F	90000	10	900000	C	525	M	P	O	N	N	N
16	23399	SW	R	5	Y	N	Y	Y	N	N	5	N	Y	Y	N	Y	Y	Y	F	90000	1	90000	R	2422	L	O	O	N	N	N
16	23399	SW	R	5	Y	N	Y	Y	N	N	5	N	Y	Y	N	Y	Y	Y	F	90000	1	90000	S	452	M	O	O	N	N	Y
17	19601	A	C	5	Y	Y	Y	Y	N	Y	49	N	Y	Y	Y	Y	Y	Y	A	15254	5.9	90000	O	291	M	P	O	N	N	N
18	1695	SW	M	5	Y	Y	Y	Y	Y	N	15	N	Y	Y	Y	Y	Y	Y	A	23810	2.1	50000	S	137	M	P	O	Y	N	N
18	1695	SW	M	5	Y	Y	Y	Y	Y	N	15	N	Y	Y	Y	Y	Y	Y	A	23810	2.1	50000	O	320	M	P	O	N	N	N
18	1695	SW	M	5	Y	Y	Y	Y	Y	N	15	N	Y	Y	Y	Y	Y	Y	A	23810	2.1	50000	S	204	M	P	O	N	N	N
19	367698	SW	R	3	Y	Y	N	Y	N	N	11	Y	Y	N	Y	N	N	Y	A	500000	0.2	100000	M	3078	L	P	O	N	N	N
19	367698	SW	R	3	Y	Y	N	Y	N	N	11	Y	Y	N	Y	N	N	Y	A	500000	0.1	50000	E	3605	L	L	L	N	N	N
19	367698	SW	R	3	Y	Y	N	Y	N	N	11	Y	Y	N	Y	N	N	Y	A	500000	0.2	100000	S	1762	L	P	O	N	N	Y
19	367698	SW	R	3	Y	Y	N	Y	N	N	11	Y	Y	N	Y	N	N	Y	A	250000	0.4	100000	C	783	M	O	O	N	N	Y
19	367698	SW	R	3	Y	Y	N	Y	N	N	11	Y	Y	N	Y	N	N	Y	A	250000	1	250000	M	289	M	P	O	N	N	Y
19	367698	SW	R	3	Y	Y	N	Y	N	N	11	Y	Y	N	Y	N	N	Y	A	250000	0.4	100000	M	3078	L	P	O	N	N	N
19	367698	SW	R	3	Y	Y	N	Y	N	N	11	Y	Y	N	Y	N	N	Y	A	250000	0.2	50000	E	3605	L	L	L	N	N	N
20	4075	SW	R	3	Y	N	Y	Y	Y	N	71	Y	Y	Y	Y	Y	Y	Y	A	22500	4	90000	S	137	M	P	O	Y	N	N
20	4075	SW	R	3	Y	N	Y	Y	Y	N	71	Y	Y	Y	Y	Y	Y	Y	A	22500	4	90000	O	320	M	P	O	N	N	N
20	4075	SW	R	3	Y	N	Y	Y	Y	N	71	Y	Y	Y	Y	Y	Y	Y	A	22500	12	270000	C	36	S	P	O	N	N	N
20	4075	SW	R	3	Y	N	Y	Y	Y	N	71	Y	Y	Y	Y	Y	Y	Y	A	22500	4	90000	O	83	S	P	O	N	N	N
20	4075	SW	R	3	Y	N	Y	Y	Y	N	71	Y	Y	Y	Y	Y	Y	Y	A	22500	20.1	450000	S	105	M	P	O	N	N	N
20	4075	SW	R	3	Y	N	Y	Y	Y	N	71	Y	Y	Y	Y	Y	Y	Y	A	22500	4	90000	C	1784	L	P	O	Y	N	N
20	4075	SW	R	3	Y	N	Y	Y	Y	N	71	Y	Y	Y	Y	Y	Y	Y	A	22500	8	180000	E	70	S	O	O	N	N	Y
20	4075	SW	R	3	Y	N	Y	Y	Y	N	71	Y	Y	Y	Y	Y	Y	Y	A	22500	4	90000	T	1243	L	P	O	Y	N	Y
20	4075	SW	R	3	Y	N	Y	Y	Y	N	71	Y	Y	Y	Y	Y	Y	Y	F	50000	1	50000	E	70	S	O	O	N	N	Y
20	4075	SW	R	3	Y	N	Y	Y	Y	N	71	Y	Y	Y	Y	Y	Y	Y	F	50000	3	150000	C	45	S	P	O	N	N	N
20	4075	SW	R	3	Y	N	Y	Y	Y	N	71	Y	Y	Y	Y	Y	Y	Y	F	50000	3	150000	T	5945	L	P	O	N	N	N
21	229012	M	R	2	Y	N	N	Y	N	N	11	Y	Y	Y	Y	N	Y	Y	F	50000	1	50000	C	127	M	O	O	N	N	N
22	3337	A	C	2	Y	N	N	Y	N	N	55	Y	Y	Y	Y	N	Y	Y	F	50000	20	1000000	C	45	S	L	L	N	N	N
23	1486033	M	M	4	Y	Y	N	Y	N	N	14	Y	Y	Y	Y	N	Y	Y	A	450000	0.2	90000	C	18	S	L	L	N	N	N
23	1486033	M	M	4	Y	Y	N	Y	N	N	14	Y	Y	Y	Y	N	Y	Y	A	450000	0.2	90000	C	20	S	L	L	N	N	N
23	1486033	M	M	4	Y	Y	N	Y	N	N	14	Y	Y	Y	Y	N	Y	Y	A	450000	0.2	90000	M	50	S	L	L	N	N	N
23	1486033	M	M	4	Y	Y	N	Y	N	N	14	Y	Y	Y	Y	N	Y	Y	A	450000	0.4	180000	M	52	S	L	L	N	N	N
23	1486033	M	M	4	Y	Y	N	Y	N	N	14	Y	Y	Y	Y	N	Y	Y	A	450000	0.2	90000	C	1784	L	O	O	Y	N	N
23	1486033	M	M	4	Y	Y	N	Y	N	N	14	Y	Y	Y	Y	N	Y	Y	A	450000	0.2	90000	O	10	S	L	L	N	N	N
23	1486033	M	M	4	Y	Y	N	Y	N	N	14	Y	Y	Y	Y	N	Y	Y	A	450000	0.2	90000	C	783	M	O	O	N	N	Y
23	1486033	M	M	4	Y	Y	N	Y	N	N	14	Y	Y	Y	Y	N	Y	Y	A	450000	0.2	90000	M	1270	L	L	L	N	N	Y
23	1486033	M	M	4	Y	Y	N	Y	N	N	14	Y	Y	Y	Y	N	Y	Y	A	450000	0.2	90000	S	40	S	L	L	N	N	N
23	1486033	M	M	4	Y	Y	N	Y	N	N	14	Y	Y	Y	Y	N	Y	Y	A	450000	0.2	90000	C	654	M	L	L	N	N	N
23	1486033	M	M	4	Y	Y	N	Y	N	N	14	Y	Y	Y	Y	N	Y	Y	A	450000	0.2	90000	C	277	M	O	O	N	N	N
23	1486033	M	M	4	Y	Y	N	Y	N	N	14	Y	Y	Y	Y	N	Y	Y	A	450000	0.2	90000	C	1528	L	P	O	N	N	N
23	1486033	M	M	4	Y	Y	N	Y	N	N	14	Y	Y	Y	Y	N	Y	Y	A	450000	0.2	90000	C	340	M	P	O	N	N	N
23	1486033	M	M	4	Y	Y	N	Y	N	N	14	Y	Y	Y	Y	N	Y	Y	A	450000	0.2	90000	C	30	S	L	L	N	N	N
23	1486033	M	M	4	Y	Y	N	Y	N	N	14	Y	Y	Y	Y	N	Y	Y	A	450000	0.2	90000	C	115	M	L	L	N	N	N
23	1486033	M	M	4	Y	Y	N	Y	N	N	14	Y	Y	Y	Y	N	Y	Y	A	450000	0.2	90000	C	279	M	L	L	Y	N	Y
23	1486033	M	M	4	Y	Y	N	Y	N	N	14	Y	Y	Y	Y	N	Y	Y	A	450000	0.2	90000	C	792	M	L	L	N	N	N
23	1486033	M	M	4	Y	Y	N	Y	N	N	14	Y	Y	Y	Y	N	Y	Y	A	450000	0.2	90000	C	525	M	L	L	Y	N	Y
23	1486033	M	M	4	Y	Y	N	Y	N	N	14	Y	Y	Y	Y	N	Y	Y	A	450000	0.2	90000	C	850	M	L	L	Y	N	Y
23	1486033	M	M	4	Y	Y	N	Y	N	N	14	Y	Y	Y	Y	N	Y	Y	A	450000	0.2	90000	C	36	S	L	L	N	N	N
23	1486033	M	M	4	Y	Y	N	Y	N	N	14	Y	Y	Y	Y	N	Y	Y	A	450000	0.2	90000	C	362	M	O	O	N	N	N
23	1486033	M	M	4	Y	Y	N	Y	N	N	14	Y	Y	Y	Y	N	Y	Y	A	450000	0.2	90000	C	5621	L	O	O	Y	N	Y
23	1486033	M	M	4	Y	Y	N	Y	N	N	14	Y	Y	Y	Y	N	Y	Y	A	450000	0.2	90000	S	18	S	O	O	N	N	Y
23	1486033	M	M	4	Y	Y	N	Y	N	N	14	Y	Y	Y	Y	N	Y	Y	A	450000	0.2	90000	O	50	S	L	L	N	N	N
23	1486033	M	M	4	Y	Y	N	Y	N	N	14	Y	Y	Y	Y	N	Y	Y	A	1000000	0.1	100000	O	10	S	L	L	N	N	N
23	1486033	M	M	4	Y	Y	N	Y	N	N	14	Y	Y	Y	Y	N	Y	Y	A	1000000	0.1	100000	C	18	S	L	L	N	N	N
23	1486033	M	M	4	Y	Y	N	Y	N	N	14	Y	Y	Y	Y	N	Y	Y	A	1000000	0.1	100000	C	20	S	L	L	N	N	N
23	1486033	M	M	4	Y	Y	N	Y	N	N	14	Y	Y	Y	Y	N	Y	Y	A	1000000	0.1	100000	C	525	M	L	L	Y	N	Y
23	1486033	M	M	4	Y	Y	N	Y	N	N	14	Y	Y	Y	Y	N	Y	Y	A	1000000	0.1	100000	C	115	M	L	L	N	N	N
23	1486033	M	M	4	Y	Y	N	Y	N	N	14	Y	Y	Y	Y	N	Y	Y	A	1000000	0.1	100000	C	340	M	P	O	N	N	N
23	1486033	M	M	4	Y	Y	N	Y	N	N	14	Y	Y	Y	Y	N	Y	Y	A	1000000	0.1	100000	C	36	S	L	L	N	N	N
23	1486033	M	M	4	Y	Y	N	Y	N	N	14	Y	Y	Y	Y	N	Y	Y	A	1000000	0.1	100000	S	18	S	O	O	N	N	Y
23	1486033	M	M	4	Y	Y	N	Y	N	N	14	Y	Y	Y	Y	N	Y	Y	A	1000000	0.1	100000	W	234	M	P	O	N	N	Y
23	1486033	M	M	4	Y	Y	N	Y	N	N	14	Y	Y	Y	Y	N	Y	Y	A	1000000	0.1	100000	C	654	M	L	L	N	N	N
24	30117	SW	M	5	Y	N	Y	Y	N	N	10	N	Y	Y	Y	Y	Y	Y	A	60000	1.5	90000	S	12	S	P	O	N	N	N
24	30117	SW	M	5	Y	N	Y	Y	N	N	10	N	Y	Y	Y	Y	Y	Y	A	60000	1.5	90000	M	623	M	P	O	N	N	Y
24	30117	SW	M	5	Y	N	Y	Y	N	N	10	N	Y	Y	Y	Y	Y	Y	A	60000	1.5	90000	S	452	M	P	O	N	N	Y
24	30117	SW	M	5	Y	N	Y	Y	N	N	10	N	Y	Y	Y	Y	Y	Y	A	60000	1.5	90000	S	34	S	P	O	N	N	N
24	30117	SW	M	5	Y	N	Y	Y	N	N	10	N	Y	Y	Y	Y	Y	Y	A	60000	1.5	90000	S	27	S	P	O	N	N	N
24	30117	SW	M	5	Y	N	Y	Y	N	N	10	N	Y	Y	Y	Y	Y	Y	A	60000	1.5	90000	S	177	M	O	O	Y	N	Y
24	30117	SW	M	5	Y	N	Y	Y	N	N	10	N	Y	Y	Y	Y	Y	Y	A	60000	1.5	90000	S	1996	L	P	O	Y	N	Y
24	30117	SW	M	5	Y	N	Y	Y	N	N	10	N	Y	Y	Y	Y	Y	Y	A	60000	1.5	90000	S	49	S	P	O	N	N	N
24	30117	SW	M	5	Y	N	Y	Y	N	N	10	N	Y	Y	Y	Y	Y	Y	A	200000	0.5	100000	S	650	M	O	O	N	N	N
24	30117	SW	M	5	Y	N	Y	Y	N	N	10	N	Y	Y	Y	Y	Y	Y	A	200000	0.5	100000	S	452	M	P	O	N	N	Y
24	30117	SW	M	5	Y	N	Y	Y	N	N	10	N	Y	Y	Y	Y	Y	Y	A	200000	0.5	100000	S	27	S	P	O	N	N	N
24	30117	SW	M	5	Y	N	Y	Y	N	N	10	N	Y	Y	Y	Y	Y	Y	A	200000	0.5	100000	S	87	S	P	O	N	N	N
24	30117	SW	M	5	Y	N	Y	Y	N	N	10	N	Y	Y	Y	Y	Y	Y	A	200000	0.5	100000	S	92	S	O	O	N	N	N
24	30117	SW	M	5	Y	N	Y	Y	N	N	10	N	Y	Y	Y	Y	Y	Y	A	200000	0.5	100000	S	12	S	L	L	N	N	N
24	30117	SW	M	5	Y	N	Y	Y	N	N	10	N	Y	Y	Y	Y	Y	Y	A	200000	0.5	100000	O	30	S	P	O	N	N	Y
24	30117	SW	M	5	Y	N	Y	Y	N	N	10	N	Y	Y	Y	Y	Y	Y	A	200000	0.5	100000	S	202	M	P	O	Y	N	N
24	30117	SW	M	5	Y	N	Y	Y	N	N	10	N	Y	Y	Y	Y	Y	Y	A	200000	0.5	100000	S	34	S	P	O	N	N	N
24	30117	SW	M	5	Y	N	Y	Y	N	N	10	N	Y	Y	Y	Y	Y	Y	A	200000	0.5	100000	M	623	M	P	O	N	N	Y
24	30117	SW	M	5	Y	N	Y	Y	N	N	10	N	Y	Y	Y	Y	Y	Y	A	200000	0.5	100000	C	68	S	L	L	N	N	N
24	30117	SW	M	5	Y	N	Y	Y	N	N	10	N	Y	Y	Y	Y	Y	Y	A	200000	1.1	200000	O	5	S	L	L	N	N	N
24	30117	SW	M	5	Y	N	Y	Y	N	N	10	N	Y	Y	Y	Y	Y	Y	A	200000	0.5	100000	S	177	M	P	O	Y	N	Y
24	30117	SW	M	5	Y	N	Y	Y	N	N	10	N	Y	Y	Y	Y	Y	Y	A	200000	0.5	100000	S	49	S	P	O	N	N	N
24	30117	SW	M	5	Y	N	Y	Y	N	N	10	N	Y	Y	Y	Y	Y	Y	A	200000	0.5	100000	S	1996	L	P	O	Y	N	Y
24	30117	SW	M	5	Y	N	Y	Y	N	N	10	N	Y	Y	Y	Y	Y	Y	A	200000	1.1	200000	W	5	S	L	L	N	N	N
24	30117	SW	M	5	Y	N	Y	Y	N	N	10	N	Y	Y	Y	Y	Y	Y	A	200000	0.5	100000	O	262	M	L	L	N	N	Y
24	30117	SW	M	5	Y	N	Y	Y	N	N	10	N	Y	Y	Y	Y	Y	Y	A	200000	0.5	100000	S	15	S	L	L	N	N	N
25	178010	SW	M	5	Y	N	Y	Y	N	N	40	Y	N	Y	N	N	Y	Y	A	150000	0.6	90000	O	154	M	P	O	N	N	Y
25	178010	SW	M	5	Y	N	Y	Y	N	N	40	Y	N	Y	N	N	Y	Y	A	150000	0.6	90000	O	410	M	P	O	Y	N	N
25	178010	SW	M	5	Y	N	Y	Y	N	N	40	Y	N	Y	N	N	Y	Y	A	150000	0.6	90000	C	75	S	L	L	N	N	N
25	178010	SW	M	5	Y	N	Y	Y	N	N	40	Y	N	Y	N	N	Y	Y	A	150000	0.6	90000	C	14	S	L	L	N	N	N
25	178010	SW	M	5	Y	N	Y	Y	N	N	40	Y	N	Y	N	N	Y	Y	A	150000	0.6	90000	C	151	M	P	O	N	N	N
25	178010	SW	M	5	Y	N	Y	Y	N	N	40	Y	N	Y	N	N	Y	Y	A	150000	0.6	90000	C	229	M	P	O	N	N	Y
25	178010	SW	M	5	Y	N	Y	Y	N	N	40	Y	N	Y	N	N	Y	Y	A	150000	0.6	90000	M	236	M	P	O	Y	N	Y
26	11417	A	C	5	Y	Y	Y	Y	N	N	13	N	Y	N	Y	N	Y	Y	A	166667	0.6	100000	E	5	S	O	O	Y	N	Y
26	11417	A	C	5	Y	Y	Y	Y	N	N	13	N	Y	N	Y	N	Y	Y	A	166667	3.2	500000	O	7937	L	P	O	Y	N	Y
26	11417	A	C	5	Y	Y	Y	Y	N	N	13	N	Y	N	Y	N	Y	Y	A	166667	0.6	100000	C	15	S	P	O	N	N	N
27	516989	SW	C	3	Y	Y	N	N	N	N	9	N	N	N	Y	Y	N	Y	A	500000	0.1	50000	E	31437	L	L	L	Y	N	Y
27	516989	SW	C	3	Y	Y	N	N	N	N	9	N	N	N	Y	Y	N	Y	A	500000	0.1	50000	E	782	M	L	L	Y	N	N
27	516989	SW	C	3	Y	Y	N	N	N	N	9	N	N	N	Y	Y	N	Y	A	500000	0.2	100000	M	1504	L	L	L	N	N	Y
27	516989	SW	C	3	Y	Y	N	N	N	N	9	N	N	N	Y	Y	N	Y	A	500000	0.1	50000	M	4685	L	L	L	Y	N	Y
27	516989	SW	C	3	Y	Y	N	N	N	N	9	N	N	N	Y	Y	N	Y	A	500000	0.1	50000	O	15	S	L	L	Y	N	Y
27	516989	SW	C	3	Y	Y	N	N	N	N	9	N	N	N	Y	Y	N	Y	A	500000	0.2	100000	M	11134	L	L	L	N	N	N
27	516989	SW	C	3	Y	Y	N	N	N	N	9	N	N	N	Y	Y	N	Y	A	500000	0.2	100000	S	6	S	L	L	N	N	N
28	2090	A	C	2	Y	Y	Y	Y	Y	N	2	Y	N	Y	Y	N	N	Y	A	500000	0.2	100000	T	102	M	P	O	N	N	N
28	2090	A	C	2	Y	Y	Y	Y	Y	N	2	Y	N	Y	Y	N	N	Y	A	500000	0.1	50000	C	56	S	O	O	N	N	N
28	2090	A	C	2	Y	Y	Y	Y	Y	N	2	Y	N	Y	Y	N	N	Y	A	500000	0.2	100000	T	152	M	L	L	N	N	N
30	2800023	T	C	1	N	N	N	Y	N	N	41	Y	Y	Y	N	N	Y	Y	A	38462	1.3	50000	T	10	S	L	L	N	N	N
30	2800023	T	C	1	N	N	N	Y	N	N	41	Y	Y	Y	N	N	Y	Y	A	38462	6.5	250000	T	8	S	L	L	Y	N	N
30	2800023	T	C	1	N	N	N	Y	N	N	41	Y	Y	Y	N	N	Y	Y	A	38462	2.6	100000	C	1528	L	L	L	N	N	N
30	2800023	T	C	1	N	N	N	Y	N	N	41	Y	Y	Y	N	N	Y	Y	A	38462	6.5	250000	T	883	M	L	L	N	N	N
30	2800023	T	C	1	N	N	N	Y	N	N	41	Y	Y	Y	N	N	Y	Y	A	38462	6.5	250000	S	850	M	L	L	N	N	N
32	15619	SW	R	4	Y	Y	N	Y	N	N	9	N	N	Y	Y	N	Y	Y	A	20000	5	100000	S	92	S	P	O	N	N	N
32	15619	SW	R	4	Y	Y	N	Y	N	N	9	N	N	Y	Y	N	Y	Y	A	20000	2.5	50000	W	650	M	O	O	Y	N	N
33	96572	SW	R	2	Y	Y	Y	Y	N	Y	8	Y	Y	Y	Y	N	Y	Y	A	142857	0.7	100000	W	11	S	P	O	N	N	N
33	96572	SW	R	2	Y	Y	Y	Y	N	Y	8	Y	Y	Y	Y	N	Y	Y	A	142857	0.7	100000	S	31	S	O	O	N	N	Y
43	112279	SW	C	4	Y	Y	N	N	N	N	1	N	N	N	N	Y	Y	Y	B	1000000	0.2	200000	C	1784	L	O	O	Y	N	N
45	14898	SW	C	5	Y	N	Y	Y	N	N	16	Y	Y	Y	Y	N	Y	Y	B	22500	4	90000	O	320	M	P	O	N	N	N
46	2787	A	C	2	Y	N	N	Y	N	N	6	Y	Y	Y	Y	N	Y	Y	B	22500	4	90000	O	320	M	P	O	N	N	N
46	2787	A	C	2	Y	N	N	Y	N	N	6	Y	Y	Y	Y	N	Y	Y	B	22500	26.1	188311	S	158	M	P	O	N	N	N
46	2787	A	C	2	Y	N	N	Y	N	N	6	Y	Y	Y	Y	N	Y	Y	B	22500	7.7	500500	O	53	S	O	O	N	N	N
46	2787	A	C	2	Y	N	N	Y	N	N	6	Y	Y	Y	Y	N	Y	Y	F	50000	2	100000	T	150	M	P	O	N	N	N
46	2787	A	C	2	Y	N	N	Y	N	N	6	Y	Y	Y	Y	N	Y	Y	F	50000	1	50000	M	18	S	O	O	N	N	N
46	2787	A	C	2	Y	N	N	Y	N	N	6	Y	Y	Y	Y	N	Y	Y	F	50000	1	50000	T	531	M	O	O	N	N	N
46	2787	A	C	2	Y	N	N	Y	N	N	6	Y	Y	Y	Y	N	Y	Y	F	50000	6	300000	S	158	M	P	O	N	N	N
46	2787	A	C	2	Y	N	N	Y	N	N	6	Y	Y	Y	Y	N	Y	Y	F	50000	2	100000	T	102	M	P	O	N	N	N
47	16250	A	C	1	Y	N	N	N	N	N	6	Y	Y	Y	Y	Y	Y	Y	F	100000	4.5	450000	O	102	M	O	O	N	N	N
47	16250	A	C	1	Y	N	N	N	N	N	6	Y	Y	Y	Y	Y	Y	Y	F	100000	0.6	60000	S	65	S	O	O	N	N	N
47	16250	A	C	1	Y	N	N	N	N	N	6	Y	Y	Y	Y	Y	Y	Y	F	100000	2	200000	C	58	S	L	L	N	N	N
47	16250	A	C	1	Y	N	N	N	N	N	6	Y	Y	Y	Y	Y	Y	Y	F	100000	1	100000	C	1784	L	O	O	Y	N	N
47	16250	A	C	1	Y	N	N	N	N	N	6	Y	Y	Y	Y	Y	Y	Y	F	100000	1	100000	E	184	M	O	O	Y	Y	Y
47	16250	A	C	1	Y	N	N	N	N	N	6	Y	Y	Y	Y	Y	Y	Y	F	100000	1	100000	S	20	S	P	O	N	N	N
47	16250	A	C	1	Y	N	N	N	N	N	6	Y	Y	Y	Y	Y	Y	Y	F	100000	0.5	50000	T	143	M	P	O	Y	N	N
47	16250	A	C	1	Y	N	N	N	N	N	6	Y	Y	Y	Y	Y	Y	Y	F	100000	0.5	50000	S	12	S	P	O	Y	N	N
47	16250	A	C	1	Y	N	N	N	N	N	6	Y	Y	Y	Y	Y	Y	Y	F	100000	0.5	50000	S	200	M	L	L	N	N	N
47	16250	A	C	1	Y	N	N	N	N	N	6	Y	Y	Y	Y	Y	Y	Y	F	100000	0.5	50000	E	3180	L	O	O	N	N	Y
47	16250	A	C	1	Y	N	N	N	N	N	6	Y	Y	Y	Y	Y	Y	Y	F	100000	0.5	50000	S	436	M	P	O	N	N	N
47	16250	A	C	1	Y	N	N	N	N	N	6	Y	Y	Y	Y	Y	Y	Y	F	100000	0.5	50000	R	35	S	L	L	N	N	N
47	16250	A	C	1	Y	N	N	N	N	N	6	Y	Y	Y	Y	Y	Y	Y	F	100000	0.5	50000	O	71	S	L	L	N	N	N
47	16250	A	C	1	Y	N	N	N	N	N	6	Y	Y	Y	Y	Y	Y	Y	F	100000	1	100000	S	10	S	L	L	N	N	N
47	16250	A	C	1	Y	N	N	N	N	N	6	Y	Y	Y	Y	Y	Y	Y	F	100000	1	100000	O	418	M	P	O	N	N	Y
47	16250	A	C	1	Y	N	N	N	N	N	6	Y	Y	Y	Y	Y	Y	Y	F	100000	1	100000	C	9	S	L	L	N	N	N
47	16250	A	C	1	Y	N	N	N	N	N	6	Y	Y	Y	Y	Y	Y	Y	F	100000	2	200000	C	1528	L	O	O	N	N	N
47	16250	A	C	1	Y	N	N	N	N	N	6	Y	Y	Y	Y	Y	Y	Y	F	100000	1	100000	S	30	S	O	O	N	N	N
49	50341	A	C	5	Y	N	Y	Y	N	N	6	Y	Y	Y	Y	N	Y	Y	F	100000	0.6	60000	S	65	S	O	O	N	N	N
49	50341	A	C	5	Y	N	Y	Y	N	N	6	Y	Y	Y	Y	N	Y	Y	F	100000	1	100000	C	1784	L	O	O	Y	N	N
49	50341	A	C	5	Y	N	Y	Y	N	N	6	Y	Y	Y	Y	N	Y	Y	F	100000	0.5	50000	E	3180	L	O	O	N	N	Y
49	50341	A	C	5	Y	N	Y	Y	N	N	6	Y	Y	Y	Y	N	Y	Y	F	100000	1	100000	O	48	S	P	O	N	N	N
49	50341	A	C	5	Y	N	Y	Y	N	N	6	Y	Y	Y	Y	N	Y	Y	F	100000	2	200000	C	50	S	P	O	N	N	N
49	50341	A	C	5	Y	N	Y	Y	N	N	6	Y	Y	Y	Y	N	Y	Y	F	100000	5	500000	C	26	S	P	O	N	N	N
49	50341	A	C	5	Y	N	Y	Y	N	N	6	Y	Y	Y	Y	N	Y	Y	F	100000	1	100000	S	20	S	P	O	N	N	N
49	50341	A	C	5	Y	N	Y	Y	N	N	6	Y	Y	Y	Y	N	Y	Y	F	100000	2	200000	C	32	S	P	O	N	N	N
49	50341	A	C	5	Y	N	Y	Y	N	N	6	Y	Y	Y	Y	N	Y	Y	F	100000	2	200000	C	50	S	P	O	Y	N	N
49	50341	A	C	5	Y	N	Y	Y	N	N	6	Y	Y	Y	Y	N	Y	Y	F	100000	1	100000	M	40	S	P	O	N	N	N
49	50341	A	C	5	Y	N	Y	Y	N	N	6	Y	Y	Y	Y	N	Y	Y	F	100000	3	300000	C	30	S	P	O	N	N	N
49	50341	A	C	5	Y	N	Y	Y	N	N	6	Y	Y	Y	Y	N	Y	Y	F	100000	1	100000	S	54	S	P	O	N	N	N
50	261227	SG	C	3	N	Y	N	N	Y	Y	3	Y	Y	N	Y	N	Y	Y	F	500000	0.2	100000	T	373	M	L	L	N	N	N
52	126933	A	C	3	Y	Y	N	Y	N	N	3	N	Y	Y	Y	Y	N	Y	F	100000	0.5	50000	E	1536	L	P	O	Y	N	N
57	234530	A	C	2	Y	N	N	Y	N	N	8	N	Y	Y	Y	N	Y	Y	F	100000	1	100000	M	1254	L	O	O	N	N	N
58	2406	SG	R	3	Y	N	N	Y	N	Y	18	Y	N	N	Y	N	Y	Y	F	50000	3	150000	T	373	M	P	O	N	N	N
58	2406	SG	R	3	Y	N	N	Y	N	Y	18	Y	N	N	Y	N	Y	Y	F	50000	3	150000	C	68	S	P	O	N	N	Y

## Sheet: Supplementary Table 4
Var1	Var2	V-value	q-value	p-value	Sample Size
industry	decarbon	0.34556	1.89727e-08	2.52969e-09	471
location	industry	0.320757	3.0267e-07	8.0712e-08	471
size	decarbon	0.319787	5.21077e-10	3.47385e-11	471
size	industry	0.274575	3.30641e-08	6.61282e-09	471
decarbon	sustainability	0.210061	1.54305e-05	5.14349e-06	471
industry	sustainability	0.199435	0.024875	0.016351	471
industry	biodiversity	0.199225	0.024875	0.0165833	471
decarbon	biodiversity	0.148658	0.00313562	0.00125425	471
size	sustainability	0.14796	0.0123578	0.00576697	471
size	location	0.140572	0.0178641	0.00952753	471
location	decarbon	0.0947497	0.0542082	0.0397527	471
biodiversity	sustainability	0.0884053	0.0687906	0.0550325	471
location	sustainability	0.0700507	0.148201	0.128441	471
size	biodiversity	0.0214196	0.897585	0.897585	471
location	biodiversity	0.0100124	0.88712	0.827979	471

## Sheet: Supplementary Table 5
site	population	vegetation	method	creators	fisher	company	local_col	municipality	local_org	acamemia	years	collaboration	education	sustainability	economy	innovation	conservation	trading	offertype	#perchasers	unit_price	volume	amount
1	3769150	M	C	3	Y	N	Y	N	Y	N	8	Y	N	Y	Y	N	N	Y	A	3	NA	22.8	800000
1	3769150	M	C	3	Y	N	Y	N	Y	N	8	Y	N	Y	Y	N	N	Y	A	3	103092	9.7	1986591
1	3769150	M	C	3	Y	N	Y	N	Y	N	8	Y	N	Y	Y	N	N	Y	B	1	103092	9.7	160050
2	1486033	M	C	5	Y	N	Y	N	Y	Y	9	Y	Y	N	N	N	Y	Y	A	8	500000	1.1	550000
2	1486033	M	C	5	Y	N	Y	N	Y	Y	9	Y	Y	N	N	N	Y	Y	A	21	500000	2.1	1050000
2	1486033	M	C	5	Y	N	Y	N	Y	Y	9	Y	Y	N	N	N	Y	Y	A	26	500000	1.8	900000
3	131936	M	C	4	Y	N	Y	Y	Y	N	7	Y	Y	Y	Y	N	Y	Y	A	14	45455	44	2000000
3	131936	M	C	4	Y	N	Y	Y	Y	N	7	Y	Y	Y	Y	N	Y	Y	A	17	83333	30.8	2500000
3	131936	M	C	4	Y	N	Y	Y	Y	N	7	Y	Y	Y	Y	N	Y	Y	A	15	87097	28.6	2520000
3	131936	M	C	4	Y	N	Y	Y	Y	N	7	Y	Y	Y	Y	N	Y	Y	A	16	30612	94.1	2900000
4	1486033	SW	C	1	N	N	N	Y	N	N	25	N	N	N	Y	N	Y	Y	A	15	250000	8.9	2100000
5	41970	SW	R	2	Y	N	Y	Y	N	N	28	N	Y	N	Y	N	Y	Y	A	26	71429	46.9	3300000
5	41970	SW	R	2	Y	N	Y	Y	N	N	28	N	Y	N	Y	N	Y	Y	A	15	90000	20	1800000
6	29479	SG	C	2	N	N	N	Y	Y	N	6	Y	Y	Y	Y	N	Y	Y	A	9	500000	1	500000
6	29479	SG	C	2	N	N	N	Y	Y	N	6	Y	Y	Y	Y	N	Y	Y	A	1	62500	0.8	50000
6	29479	SG	C	2	N	N	N	Y	Y	N	6	Y	Y	Y	Y	N	Y	Y	A	8	500000	0.9	450000
7	1170275	M	M	2	Y	N	N	Y	N	N	37	N	N	Y	Y	N	Y	Y	A	4	125000	2.4	300000
7	1170275	M	M	2	Y	N	N	Y	N	N	37	N	N	Y	Y	N	Y	Y	A	3	100000	5.2	500000
8	113179	SW	R	2	Y	N	N	N	Y	N	14	N	Y	Y	Y	N	Y	Y	A	5	12195	41	500000
8	113179	SW	R	2	Y	N	N	N	Y	N	14	N	Y	Y	Y	N	Y	Y	A	1	5114	17.6	90000
8	113179	SW	R	2	Y	N	N	N	Y	N	14	N	Y	Y	Y	N	Y	Y	F	1	15254	2	100000
8	113179	SW	R	2	Y	N	N	N	Y	N	14	N	Y	Y	Y	N	Y	Y	F	1	50000	4	200000
8	113179	SW	R	2	Y	N	N	N	Y	N	14	N	Y	Y	Y	N	Y	Y	F	1	50000	2	100000
9	31693	SW	R	5	Y	Y	Y	N	N	Y	17	Y	Y	Y	Y	Y	Y	Y	A	16	81081	45.6	3700000
10	49858	SG	R	5	Y	N	N	Y	Y	N	18	Y	Y	Y	Y	N	Y	Y	A	3	176471	3.3	600000
10	49858	SG	R	5	Y	N	N	Y	Y	N	18	Y	Y	Y	Y	N	Y	Y	A	1	5000	20	100000
11	123483	M	M	4	Y	Y	N	Y	N	Y	11	N	Y	N	Y	N	Y	Y	B	1	200000	1	200000
11	123483	M	M	4	Y	Y	N	Y	N	Y	11	N	Y	N	Y	N	Y	Y	A	4	16071	39.5	630000
11	123483	M	M	4	Y	Y	N	Y	N	Y	11	N	Y	N	Y	N	Y	Y	A	1	181818	1.1	200000
11	123483	M	M	4	Y	Y	N	Y	N	Y	11	N	Y	N	Y	N	Y	Y	A	1	2558	39.1	100000
11	123483	M	M	4	Y	Y	N	Y	N	Y	11	N	Y	N	Y	N	Y	Y	A	1	142857	0.7	100000
12	10376	SW	R	3	Y	N	N	Y	Y	N	9	Y	N	Y	N	N	Y	Y	F	2	200000	2	400000
12	10376	SW	R	3	Y	N	N	Y	Y	N	9	Y	N	Y	N	N	Y	Y	F	1	100000	1	100000
12	10376	SW	R	3	Y	N	N	Y	Y	N	9	Y	N	Y	N	N	Y	Y	F	3	100000	0.5	50000
12	10376	SW	R	3	Y	N	N	Y	Y	N	9	Y	N	Y	N	N	Y	Y	F	2	100000	5.5	550000
14	126361	M	C	2	Y	N	N	Y	N	N	11	N	Y	Y	Y	N	Y	Y	A	13	153846	30	4500000
14	126361	M	C	2	Y	N	N	Y	N	N	11	N	Y	Y	Y	N	Y	Y	B	3	66667	3.5	310000
14	126361	M	C	2	Y	N	N	Y	N	N	11	N	Y	Y	Y	N	Y	Y	B	4	100000	22	800000
14	126361	M	C	2	Y	N	N	Y	N	N	11	N	Y	Y	Y	N	Y	Y	A	2	5806	46.5	270000
14	126361	M	C	2	Y	N	N	Y	N	N	11	N	Y	Y	Y	N	Y	Y	A	2	12587	28.6	360000
14	126361	M	C	2	Y	N	N	Y	N	N	11	N	Y	Y	Y	N	Y	Y	F	6	50000	26.8	1340000
14	126361	M	C	2	Y	N	N	Y	N	N	11	N	Y	Y	Y	N	Y	Y	A	1	2315	21.6	50000
14	126361	M	C	2	Y	N	N	Y	N	N	11	N	Y	Y	Y	N	Y	Y	A	7	90909	21.3	1900000
15	31667	SW	R	5	Y	Y	Y	Y	Y	N	8	Y	Y	Y	Y	N	Y	Y	A	3	41667	12	500000
16	23399	SW	R	5	Y	N	Y	Y	N	N	5	N	Y	Y	N	Y	Y	Y	A	1	3659	24.6	90000
16	23399	SW	R	5	Y	N	Y	Y	N	N	5	N	Y	Y	N	Y	Y	Y	F	3	90000	12	1080000
16	23399	SW	R	5	Y	N	Y	Y	N	N	5	N	Y	Y	N	Y	Y	Y	F	1	90000	1	90000
17	19601	A	C	5	Y	Y	Y	Y	N	Y	49	N	Y	Y	Y	Y	Y	Y	A	1	15254	5.9	90000
18	1695	SW	M	5	Y	Y	Y	Y	Y	N	15	N	Y	Y	Y	Y	Y	Y	A	3	23810	6.3	150000
19	367698	SW	R	3	Y	Y	N	Y	N	N	11	Y	Y	N	Y	N	N	Y	A	3	500000	0.5	250000
19	367698	SW	R	3	Y	Y	N	Y	N	N	11	Y	Y	N	Y	N	N	Y	A	4	250000	2	500000
20	4075	SW	R	3	Y	N	Y	Y	Y	N	71	Y	Y	Y	Y	Y	Y	Y	A	8	22500	60.1	1350000
20	4075	SW	R	3	Y	N	Y	Y	Y	N	71	Y	Y	Y	Y	Y	Y	Y	F	3	50000	7	350000
21	229012	M	R	2	Y	N	N	Y	N	N	11	Y	Y	Y	Y	N	Y	Y	F	1	50000	1	50000
22	3337	A	C	2	Y	N	N	Y	N	N	55	Y	Y	Y	Y	N	Y	N	F	1	50000	20	1000000
23	1486033	M	M	4	Y	Y	N	Y	N	N	14	Y	Y	Y	Y	N	Y	Y	A	24	450000	5	2250000
23	1486033	M	M	4	Y	Y	N	Y	N	N	14	Y	Y	Y	Y	N	Y	Y	A	10	1000000	1	1000000
24	30117	SW	M	5	Y	N	Y	Y	N	N	10	N	Y	Y	Y	Y	Y	Y	A	8	60000	12	720000
24	30117	SW	M	5	Y	N	Y	Y	N	N	10	N	Y	Y	Y	Y	Y	Y	A	18	200000	10.2	2000000
25	178010	SW	M	5	Y	N	Y	Y	N	N	40	Y	N	Y	N	N	Y	Y	A	7	150000	4.2	630000
26	11417	A	C	5	Y	Y	Y	Y	N	N	13	N	Y	N	Y	N	Y	Y	A	3	166667	4.4	700000
27	516989	SW	C	3	Y	Y	N	N	N	N	9	N	N	N	Y	Y	N	Y	A	7	500000	1	500000
28	2090	A	C	2	Y	Y	Y	Y	Y	N	2	Y	N	Y	Y	N	N	Y	A	3	500000	0.5	250000
30	2800023	T	C	1	N	N	N	Y	N	N	41	Y	Y	Y	N	N	Y	Y	A	5	38462	23.4	900000
32	15619	SW	R	4	Y	Y	N	Y	N	N	9	N	N	Y	Y	N	Y	Y	A	2	20000	7.5	150000
33	96572	SW	R	2	Y	Y	Y	Y	N	Y	8	Y	Y	Y	Y	N	Y	Y	A	2	142857	1.4	200000
43	112279	SW	C	4	Y	Y	N	N	N	N	1	N	N	N	N	Y	Y	Y	B	1	1000000	0.2	200000
45	14898	SW	C	5	Y	N	Y	Y	N	N	16	Y	Y	Y	Y	N	Y	Y	B	1	22500	4	90000
46	2787	A	C	2	Y	N	N	Y	N	N	6	Y	Y	Y	Y	N	Y	Y	B	3	22500	37.8	778811
46	2787	A	C	2	Y	N	N	Y	N	N	6	Y	Y	Y	Y	N	Y	Y	F	5	50000	12	600000
47	16250	A	C	1	Y	N	N	N	N	N	6	Y	Y	Y	Y	Y	Y	Y	F	16	100000	16.6	1660000
47	16250	A	C	1	Y	N	N	N	N	N	6	Y	Y	Y	Y	Y	Y	Y	F	2	100000	3	300000
49	50341	A	C	5	Y	N	Y	Y	N	N	6	Y	Y	Y	Y	N	Y	Y	F	11	100000	19.1	1910000
49	50341	A	C	5	Y	N	Y	Y	N	N	6	Y	Y	Y	Y	N	Y	Y	F	1	100000	1	100000
50	261227	SG	C	3	N	Y	N	N	Y	Y	3	Y	Y	N	Y	N	Y	Y	F	1	500000	0.2	100000
52	126933	A	C	3	Y	Y	N	Y	N	N	3	N	Y	Y	Y	Y	N	Y	F	1	100000	0.5	50000
57	234530	A	C	2	Y	N	N	Y	N	N	8	N	Y	Y	Y	N	Y	Y	F	1	100000	1	100000
58	2406	SG	R	3	Y	N	N	Y	N	Y	18	Y	N	N	Y	N	Y	Y	F	2	50000	6	300000

## Sheet: Supplementary Table 6
Creator	Buyer	Effect Type	Association Strength	q-value	p-value	Sample Size
vegetation	location	cramersV	0.430979	6.13234e-17	1.20242e-18	466
method	location	cramersV	0.384852	3.49938e-14	1.02923e-15	466
innovation	industry	cramersV	0.338775	1.77442e-07	8.69813e-09	466
municipality	location	cramersV	0.311161	4.72897e-10	1.8545e-11	466
sustainability	industry	cramersV	0.288386	5.56504e-05	5.45592e-06	466
economy	location	cramersV	0.255078	6.22689e-07	3.66288e-08	466
population	location	eta2	0.253552	2.55966e-29	2.50947e-31	466
method	industry	cramersV	0.249536	1.26726e-05	1.11817e-06	466
fisher	industry	cramersV	0.247968	0.00232484	0.000364681	466
academia	industry	cramersV	0.237796	0.00466388	0.000914486	466
academia	location	cramersV	0.235431	4.87127e-06	3.7296e-07	466
economy	industry	cramersV	0.230121	0.00856185	0.00176273	466
vegetation	industry	cramersV	0.206389	0.000628334	7.39216e-05	466
conservation	industry	cramersV	0.200533	0.0537504	0.0163162	466
municipality	industry	cramersV	0.194344	0.0699957	0.0244278	466
conservation	size	cramersV	0.185188	0.00231836	0.000338622	466
collaboration	industry	cramersV	0.185023	0.115581	0.0430597	466
education	industry	cramersV	0.182463	0.13046	0.0498816	466
municipality	size	cramersV	0.182167	0.00263127	0.000438545	466
local_org	location	cramersV	0.177604	0.000989414	0.000126102	466
local_col	industry	cramersV	0.166035	0.265749	0.117242	466
collaboration	location	cramersV	0.165934	0.00231836	0.000340935	466
company	industry	cramersV	0.164063	0.283369	0.128567	466
academia	size	cramersV	0.15989	0.0114807	0.00258879	466
local_org	industry	cramersV	0.156753	0.362025	0.177463	466
sustainability	location	cramersV	0.154471	0.00458617	0.000854287	466
education	size	cramersV	0.151088	0.0192166	0.00489836	466
vegetation	sustain	cramersV	0.150646	0.050147	0.0142575	466
innovation	location	cramersV	0.137184	0.0130155	0.00306247	466
innovation	size	cramersV	0.132885	0.0537504	0.0163359	466
conservation	location	cramersV	0.131494	0.0184888	0.00453157	466
vegetation	size	cramersV	0.131488	0.0479323	0.0131579	466
local_org	size	cramersV	0.120179	0.0952606	0.0345553	466
education	carbon	cramersV	0.117945	0.0411547	0.0108939	466
method	size	cramersV	0.110261	0.0699957	0.0230885	466
sustainability	size	cramersV	0.110254	0.15013	0.0588744	466
education	location	cramersV	0.105935	0.0699957	0.0222064	466
method	biodiversity	cramersV	0.101594	0.224591	0.0902768	466
local_col	size	cramersV	0.0965948	0.263623	0.11372	466
economy	size	cramersV	0.0934745	0.283369	0.130572	466
population	industry	eta2	0.0930297	4.87127e-06	3.8206e-07	466
vegetation	carbon	cramersV	0.0851012	0.622727	0.337357	466
collaboration	carbon	cramersV	0.0739818	0.261535	0.110255	466
method	sustain	cramersV	0.0727666	0.553928	0.291205	466
creators	industry	eta2	0.0690439	0.00059326	6.3979e-05	466
academia	sustain	cramersV	0.0689863	0.289918	0.136432	466
collaboration	sustain	cramersV	0.0661455	0.319167	0.153325	466
vegetation	biodiversity	cramersV	0.0634665	0.897471	0.598314	466
collaboration	size	cramersV	0.0607544	0.70841	0.423152	466
fisher	size	cramersV	0.058319	0.736581	0.452731	466
company	sustain	cramersV	0.0502567	0.545828	0.277969	466
economy	biodiversity	cramersV	0.0486869	0.553928	0.293256	466
method	carbon	cramersV	0.0477876	0.897471	0.587375	466
municipality	carbon	cramersV	0.0440282	0.622727	0.341889	466
sustainability	biodiversity	cramersV	0.0432405	0.627383	0.350596	466
company	biodiversity	cramersV	0.0390892	0.689399	0.39877	466
years	industry	eta2	0.0377703	0.0699957	0.0235057	466
local_org	carbon	cramersV	0.0370636	0.70841	0.423657	466
sustainability	carbon	cramersV	0.0346131	0.736581	0.454947	466
municipality	sustain	cramersV	0.0333153	0.752299	0.472031	466
company	size	cramersV	0.0255943	1	0.858447	466
years	location	eta2	0.0245279	0.00392165	0.000692055	466
local_org	sustain	cramersV	0.0235941	0.899745	0.610523	466
conservation	carbon	cramersV	0.0231359	0.899745	0.617472	466
local_col	location	cramersV	0.0224562	0.901974	0.627845	466
municipality	biodiversity	cramersV	0.021525	0.909747	0.642174	466
creators	location	eta2	0.0205112	0.00899289	0.00193964	466
academia	carbon	cramersV	0.0179688	0.963882	0.698095	466
local_org	biodiversity	cramersV	0.0171227	0.963882	0.71166	466
innovation	sustain	cramersV	0.0162908	0.963882	0.725086	466
creators	size	eta2	0.015859	0.0699957	0.0247044	466
local_col	sustain	cramersV	0.0155517	0.963882	0.737086	466
fisher	carbon	cramersV	0.0140514	0.978404	0.76164	466
conservation	sustain	cramersV	0.0137031	0.978404	0.767375	466
company	carbon	cramersV	0.00997431	1	0.829521	466
education	sustain	cramersV	0.00969299	1	0.834259	466
population	size	eta2	0.00959438	0.260665	0.107333	466
economy	sustain	cramersV	0.0073775	1	0.873465	466
innovation	carbon	cramersV	0.00726064	1	0.875453	466
company	location	cramersV	0.00628378	1	0.892099	466
economy	carbon	cramersV	0.00550708	1	0.905369	466
fisher	location	cramersV	0.00373819	1	0.935683	466
fisher	sustain	cramersV	0.00271035	1	0.953344	466
years	carbon	eta2	0.00253302	0.545828	0.278265	466
years	size	eta2	0.00222451	0.897471	0.597173	466
years	sustain	eta2	0.00164651	0.672049	0.382146	466
creators	carbon	eta2	0.000952647	0.794459	0.506273	466
collaboration	biodiversity	cramersV	0.00086731	1	0.985062	466
fisher	biodiversity	cramersV	0.000727836	1	0.987464	466
local_col	carbon	cramersV	0.000577709	1	0.99005	466
population	sustain	eta2	0.000279533	0.963882	0.718866	466
creators	biodiversity	eta2	0.000256516	0.963882	0.730219	466
population	carbon	eta2	0.000149052	0.98838	0.792665	466
population	biodiversity	eta2	0.00014092	0.98838	0.798275	466
years	biodiversity	eta2	0.000132499	0.98838	0.80427	466
creators	sustain	eta2	5.17042e-06	1	0.960956	466
academia	biodiversity	cramersV	1.11718e-15	1	1	466
local_col	biodiversity	cramersV	3.0676e-16	1	1	466
innovation	biodiversity	cramersV	2.87003e-16	1	1	466
conservation	biodiversity	cramersV	9.16503e-17	1	1	466
education	biodiversity	cramersV	5.17141e-17	1	1	466
sustainability	sustain	cramersV	5.134e-17	1	1	466

## Sheet: Supplementary Table 7
Number of buyers												Unit price
effect	term	estimate	std.error	effect size	df	p-value	conf.low	conf.high	t-value	Sample Size		effect	term	estimate	std.error	effect size	df	p-value	conf.low	conf.high	t-value	Sample Size
fixed	conservation Y	7.94292	3.6733	2.16234	54.5344	0.0349959	0.580051	15.3058	2.16234	77		fixed	company Y	329646	64819.2	5.08562	55	4.56177e-06	199745	459547	5.08562	76
fixed	collaboration Y	5.49805	1.66536	3.30142	54.5602	0.00170044	2.16	8.83611	3.30142	77		fixed	collaboration Y	118321	42988.2	2.75242	55	0.00799785	32171.1	204472	2.75242	76
fixed	local_col Y	3.44435	2.45537	1.40279	55.5069	0.16625	-1.4753	8.364	1.40279	77		fixed	vegetation SG	354279	132204	2.67978	55	0.00970009	89335.7	619223	2.67978	76
fixed	innovation Y	3.27578	2.45205	1.33594	54.8315	0.187088	-1.63857	8.19013	1.33594	77		fixed	education Y	84556	58663.1	1.44138	55	0.155146	-33007.4	202119	1.44138	76
fixed	vegetation M	3.09437	2.76704	1.11829	55.9549	0.268219	-2.44878	8.63751	1.11829	77		fixed	vegetation M	91890.5	66240	1.38724	55	0.170966	-40857.5	224638	1.38724	76
fixed	vegetation MB	1.72277	3.76279	0.457843	55.1983	0.648862	-5.81742	9.26295	0.457843	77		fixed	vegetation MB	99334.4	89632.9	1.10824	55	0.272583	-80293.9	278963	1.10824	76
fixed	economy Y	1.69896	2.84622	0.596918	54.2366	0.553046	-4.00679	7.40471	0.596918	77		fixed	population	37085.5	33507.3	1.10679	55	0.273202	-30064.6	104236	1.10679	76
fixed	education Y	1.3682	2.26023	0.605335	54.4308	0.547472	-3.16247	5.89886	0.605335	77		fixed	conservation Y	97472.2	95292.4	1.02288	55	0.310845	-93498	288442	1.02288	76
fixed	method M	0.497388	2.73331	0.181973	55.7382	0.856264	-4.97865	5.97343	0.181973	77		fixed	years	11625.1	20930.1	0.555423	55	0.580858	-30319.9	53570	0.555423	76
fixed	population	0.314726	1.43682	0.219044	54.8605	0.827429	-2.56488	3.19434	0.219044	77		fixed	local_col Y	30279.8	61168.5	0.495022	55	0.622557	-92304.7	152864	0.495022	76
fixed	fisher Y	-0.895449	5.67738	-0.157722	55.7542	0.875246	-12.2697	10.4788	-0.157722	77		fixed	fisher Y	54009.6	143798	0.375593	55	0.708664	-234168	342187	0.375593	76
fixed	years	-0.902072	0.805272	-1.12021	54.5262	0.267535	-2.51619	0.712045	-1.12021	77		fixed	method M	13618.3	69124.1	0.197012	55	0.844544	-124909	152146	0.197012	76
fixed	#creators	-0.903728	1.29245	-0.699234	54.3227	0.487389	-3.49459	1.68713	-0.699234	77		fixed	innovation Y	-11343.6	62962.4	-0.180164	55	0.857686	-137523	114836	-0.180164	76
fixed	local_org Y	-1.05125	2.02591	-0.518905	54.3782	0.605932	-5.11231	3.0098	-0.518905	77		fixed	local_org Y	-57312.8	52653	-1.0885	55	0.281122	-162832	48206.3	-1.0885	76
fixed	municipality Y	-1.32319	2.81152	-0.47063	54.4273	0.639785	-6.95894	4.31256	-0.47063	77		fixed	#creators	-56944	33807.5	-1.68436	55	0.0977794	-124696	10807.7	-1.68436	76
fixed	method R	-1.32438	3.27383	-0.404535	55.3506	0.687378	-7.88435	5.23559	-0.404535	77		fixed	municipality Y	-131706	73022.3	-1.80364	55	0.0767654	-278046	14633.9	-1.80364	76
fixed	company Y	-2.4732	2.59285	-0.953854	55.6829	0.34428	-7.66794	2.72155	-0.953854	77		fixed	method R	-172171	78901.9	-2.18209	55	0.0333927	-330294	-14047.8	-2.18209	76
fixed	vegetation SG	-2.96228	5.46274	-0.542269	55.9076	0.589788	-13.9059	7.98131	-0.542269	77		fixed	sustainability Y	-136810	57907.2	-2.36258	55	0.0217129	-252859	-20761.8	-2.36258	76
fixed	academia Y	-4.49841	2.90032	-1.55101	54.4746	0.126691	-10.312	1.31521	-1.55101	77
fixed	sustainability Y	-6.88297	2.22025	-3.10009	54.2054	0.00306654	-11.3339	-2.43203	-3.10009	77
